# Supplementary material for: Changes in the urinary proteome in rats with regular swimming exercise
Source: PeerJ. 2021 Nov 1;9:e12406. doi: 10.7717/peerj.12406 (PMC8567855; doi:10.7717/peerj.12406)
Supplement: Supplemental Information 2 [file peerj-09-12406-s002.xlsx]

## Sheet: Table S1
m/z	z	t start (min)	t stop (min)	Name	Isolation Window (m/z)
369.5	2	0	90		39
398.5	2	0	90		19
415	2	0	90		14
430	2	0	90		16
446.5	2	0	90		17
463.5	2	0	90		17
477.5	2	0	90		11
490	2	0	90		14
503	2	0	90		12
515.5	2	0	90		13
528	2	0	90		12
541	2	0	90		14
553	2	0	90		10
564.5	2	0	90		13
576.5	2	0	90		11
588.5	2	0	90		13
600.5	2	0	90		11
613	2	0	90		14
627	2	0	90		14
642	2	0	90		16
657	2	0	90		14
671	2	0	90		14
686.5	2	0	90		17
703.5	2	0	90		17
721	2	0	90		18
741	2	0	90		22
762	2	0	90		20
782.5	2	0	90		21
803.5	2	0	90		21
825	2	0	90		22
850.5	2	0	90		29
879	2	0	90		28
910.5	2	0	90		35
956	2	0	90		56
1027.5	2	0	90		87
1214.5	2	0	90		287
