# Supplementary material for: Changes in the urinary proteome in rats with regular swimming exercise
Source: PeerJ. 2021 Nov 1;9:e12406. doi: 10.7717/peerj.12406 (PMC8567855; doi:10.7717/peerj.12406)
Supplement: Supplemental Information 3 [file peerj-09-12406-s003.xlsx]

## Sheet: 1
Uniprot ID	W2-S1	W2-S2	W2-S3	W2-S4	W2-S5	W2-S6	W5-S1	W5-S2	W5-S3	W5-S4	W5-S5	W5-S6	W7-S1	W7-S2	W7-S3	W7-S4	W7-S5	W7-S6	W2-C1	W2-C2	W2-C3	W2-C4	W5-C1	W5-C2	W5-C3	W5-C4	W7-C1	W7-C2	W7-C3	W7-C4
A2TGX5	190986	209301	314100	322896	246779	2302.06	211008	188106	224089	233279	187333	351.507	190616	103509	254299	209260	230465	137759	236913	187804	340614	445840	294204	78662.5	865810	347021	344652	90824.9	1.42105e+06	252340
B0BND0	38863.9	66156.7	33573.8	34244.7	68898.6	73561.4	21323.1	71699.3	32015	30390.7	73230.4	69061.1	223193	80947.5	27875.3	44836.3	29097.1	100030	80000.5	79239.2	104068	67041.7	30951.6	52265.3	347990	50672.2	44494.7	74463.9	192216	58484
B0BNN3	2589.98	7632.96	609.116	45978.9	25321.8	86725.8	75064	172918	290323	76627	326299	423378	292871	607212	399508	257696	269799	209867	32089.8	7032.17	36218.5	55904.5	106890	73200.4	1.24949e+06	20360.2	113681	91393.6	443431	38621
B5DFC9	268546	194409	304469	172013	433010	165990	97067.7	162313	116077	65703.5	74063.6	64618.6	128416	153213	100654	111146	68343.1	59886	658437	348111	804309	612779	284226	179447	355311	167244	48647.3	58512.4	1.43384e+06	50153.5
D3ZF92	19195.4	31331.9	27239.1	37917.5	25446.4	22480.9	21654.3	37429.6	15369.9	17502.2	11437.3	12591.5	27743.4	34996.1	13263.6	22851.2	18663.6	13341.9	40916.6	15645.9	19904.3	20611.8	34713.1	27643.9	257801	16577.3	45650.1	10523.5	672165	17728.1
D3ZTD8	22262.9	20863.7	33822.9	16116.7	23319.9	16103.6	12549.5	6470.75	11548.2	3952.14	14834.4	7385.57	13265.4	19331	20827.7	5311.51	10051.3	6470.06	19692.7	11126.8	13585.9	19840.8	19399.3	13326.4	278372	24615.2	19338.8	18442.1	616945	10598.8
D3ZTE0	318759	435442	464666	489283	460920	266773	151510	170111	199218	190022	118765	112816	190017	191484	149311	116442	144189	111510	303867	421852	411542	353968	209630	191916	1.87313e+06	108707	228692	89734	3.00991e+06	66962.9
D3ZTV3	42584	53006.2	94011.7	52784.1	50178.8	27805.3	41405	37199.6	62923.5	32438.6	26786.8	34944.8	36093.9	39799	35651.1	12907	35879.5	30284	535859	31467.5	42047.7	42835.9	47802.2	59929.3	131751	63137.9	49576.8	26391.4	684594	21483.6
D3ZTX0	9504.26	21734	23351.1	19281	16070.6	13545.6	9805.29	12652.8	7064.17	8192.42	7492.38	8394.71	8656.13	17998.3	8954.93	13072.3	7107.9	6887.64	10530.4	7331.45	8293.36	7125.42	13084.6	6153.01	359191	6087.12	16895.6	1738.04	616945	3117.42
D3ZUK3	87590.2	128449	117086	113196	94347.8	91295.5	111721	87580.7	94313.4	109955	39335.7	63363.6	89498.6	78432.4	87596.9	77959.3	91234.6	56077.8	63385.3	93333.4	57719.9	75914.5	147281	45850.6	3.7318e+06	143116	199074	82713.4	734723	115229
D4A1J4	8259.57	10051.7	15063.6	11423.6	9929.27	13215.6	15147.3	33327.5	25899.8	13773.9	50512.4	21935.2	8783.33	33125.7	33257.8	42233.4	18836.5	26003.1	12189.8	11751.3	19435.4	18484.9	29931.3	18421.1	292787	18386.5	42673.3	31471.5	628184	30885.2
D4ACX8	10006.2	14380.8	15329.7	9326.92	9810.95	9362.55	8562.43	8243.98	5325.33	16706.1	9661.07	3210.36	6590.58	5550.14	7803.91	6464.37	4445.1	8891.48	14736.2	30759.9	15798.2	50196.8	10504.3	4447.11	291215	8482.97	20262	10030.5	504008	4871.41
G3V686	120153	162440	321349	311996	196263	304523	683092	153619	484470	1.00849e+06	197557	466332	803249	685084	272970	185186	432601	460308	288682	96990	50848.8	84195	151126	250822	464781	78347.9	323102	282064	812181	447073
G3V7W1	57083.9	38088.4	27132.5	38569.5	42494	47840.3	76183.1	121118	79381	102314	110470	79706.7	85541.4	95055.9	69596.9	61009.8	119753	129298	32900.8	58211.6	39609.2	41476.1	74581.4	98686.8	3.74249e+06	48451.7	77659.8	125865	1.04178e+06	86789.9
iRT-Kit_WR_fusion	800215872	1193756288	1082911616	819615360	835502400	875586688	1456871040	1823454208	2270613504	1722469504	1779071360	1561718784	2488329728	3495795968	3019840256	1970551552	1690235776	2086069888	1011169728	781436800	986533568	925022848	2396392448	2983034112	62901166080	1998349440	3098386688	2322963968	17012047872	1644089728
O08628	111222	112055	175622	125403	130612	115036	132130	149598	124189	122590	116575	127893	123924	140841	105286	114899	161657	119983	133796	140455	188789	127588	135230	154153	55965	109117	105257	60103	417238	39710.3
O08837	76423.8	8026167	23319192	15270297	11517698	23325318	80841744	3.52226e+06	24276240	4.47481e+06	2.5932e+06	21575484	82474696	25172112	3.09331e+06	21060544	43689212	24035040	10031141	26062654	24298032	13091097	30467534	9712045	4.47517e+06	17035670	21158282	14482796	24626528	12512467
O35142	38312.1	25180.3	87027.6	29558.5	26024.5	20702.3	82071.3	74945.5	116806	83767.5	69559.2	86628.9	71405	64556.4	67307.2	77860.6	91175	47295.4	41746.1	29455.3	37070.2	13592.2	129051	85884.9	391839	50327	71128	95527.1	1.79289e+06	71136.1
O35217	311626	229230	274023	240867	291862	330584	318611	357270	308556	266373	325998	378256	403238	394215	357684	376839	389865	337726	261989	276376	200687	447793	382763	272060	2017396	397327	63475.4	351393	705899	184418
O35264	18052.8	5794.66	12001.1	18856.3	23531.2	17655.5	19413.4	20359	21429.1	20818.7	27394.4	23340.8	13424.3	17440.8	33017.4	24388.8	23404.8	26444.6	14570.5	15060.8	22944.9	23329.9	15355.5	7961.73	257801	16279.3	23034.8	16207.1	616945	15302.4
O35568	422206	1.22545e+06	1.25448e+06	642238	670668	804231	352315	411878	347513	326616	337540	292470	221232	648671	323057	399042	253186	205767	603630	617580	921272	926598	465254	358869	451002	728562	706176	407527	239027	326929
O35760	65038.5	62049	50276.9	20302.4	62426.6	30808.1	122462	126532	162905	45630.4	137115	54773.4	126683	126295	149266	113365	68894.3	51216.3	67163.3	25757.1	25303	32639.8	121934	97226.8	3.66051e+06	90670.7	57404.3	90474.3	526421	43820.9
O35763	235491	109652	92983.3	141188	180011	483174	170981	502009	176936	293324	688399	417391	128683	599026	134098	298304	224197	936704	565909	175595	224805	193641	295606	292285	644422	352199	727094	391867	728669	416595
O35952	16039.4	9745.7	17892.2	16056.5	7564.29	11476.6	20120.5	39209.7	37920.6	60009.1	48476.5	34446.5	26088.9	48928.4	32379.2	30265.5	30761.9	55100.1	10624.5	21864.7	19427.5	16330.5	25232.6	29916.7	257801	37774.7	54250.7	33661	351504	30016.2
O54715	12920.9	35702	28660.3	9197.3	55868.1	15846.2	57023	56075.1	57005.2	14997.8	69123.1	43284.4	35097	84286.3	64538	81524.5	32805.9	38487.9	61440.2	63946.3	12146.4	60902.9	31661	52743.7	324153	94745.4	48503.8	15394.1	8.09273e+06	21300
O54800;Q5DWV2	86737.6	111451	357811	19418.7	100278	18591.7	285505	291580	160960	193899	316616	88198.2	206874	333554	239607	332950	87836.1	73975.9	43039.6	93163.1	124816	135703	89358.1	431356	1.3732e+06	114239	517828	270661	723184	164569
O54858	468829	22333.8	908889	387732	368925	442284	610287	166389	279301	455375	59996.7	326748	398735	149851	175027	113810	259780	204791	115063	318597	1.02661e+06	476290	613291	205673	461985	402155	462814	207055	830373	391457
O54861	244219	298990	374518	317936	289566	262325	168275	168041	166850	156565	130452	174011	166761	147908	167480	113920	214526	149165	217797	248783	243716	241803	132862	193526	987361	297333	92520.1	102977	554727	106100
O54947	34090	62861.4	62328.1	40570.8	27555.5	37969.7	28596.8	35320.6	26300.2	30051.5	25651.9	34514.6	27061.5	37688.5	28360.9	28281.3	36262.6	21630.4	42534.7	35681.6	27424.2	51710.6	35329.5	41535.8	342430	78340.2	58222.8	29487.7	8.34461e+06	31218.9
O55004	38427.6	59816.6	37217.7	60232.6	30757.9	31212	205174	561518	525180	231135	318703	162881	329769	921860	368256	387364	215534	204607	118447	98177	77130.5	55072.5	101700	32607	280811	96579.6	304256	152037	177851	107725
O55006	258142	417971	295038	232882	133764	166351	435602	323209	342695	448634	236925	341003	533660	390677	233899	205125	301524	260802	213434	197008	339594	223444	213892	239416	1.43196e+06	367698	338996	240430	876689	311735
O55145	161424	161736	236851	154344	179332	122352	71252.5	93501.5	21922.6	63145.9	69581.5	81880.3	39610.4	71227.9	59430.3	61547.5	78032.2	64441.4	149774	189611	103077	162798	39219.4	117156	330027	92027.3	86913.3	70853.4	424888	64613.3
O70215	12514.1	14222.6	15912.2	24891.8	19647.9	12550.6	11447.1	27145.1	28817.8	15090	29063.6	26289.8	13918.5	25074	18864.3	2168.27	26308.4	20723.9	18143.7	19147	17566.1	23121.7	4442.47	10566	257801	5372.14	17933.2	21489.8	616945	23317.4
O70244	295483	212434	255667	368668	255539	225891	165962	109924	142289	159894	71473.1	125512	195662	136205	179835	141940	257557	134795	180866	247557	313463	330572	160802	127530	511120	194645	164065	134749	457968	172377
O70247	24263	20018.5	20366.6	13072.3	3721.84	9189.44	14595.8	6475.21	10841.7	17397.7	32999.3	26570.6	17660.8	32393.3	15285.9	18074.1	21334.5	23754.3	48853.4	23584.1	43405.5	6337.52	12320.9	20392.5	238114	22890.7	34065.2	17273.4	475152	14349.5
O70417	2.36852e+06	2.99878e+06	681527	3.07975e+06	2.16991e+06	2.36099e+06	2.94905e+06	1.56461e+06	435893	3.583e+06	1.55287e+06	1.29244e+06	4.15751e+06	1.53117e+06	544899	1.78611e+06	3.99123e+06	1963342	2.36313e+06	10084334	13015164	2391331	2.24383e+06	10551231	15783258	1.90201e+06	2.0408e+06	4135043	10628123	1.37568e+06
O70489	124401	86852.6	128827	130502	62136.9	113230	173626	191049	245684	176438	149791	164395	278459	247840	206345	214287	258917	224176	71523.3	78563.5	89317.9	95420.8	199131	236649	3.16172e+07	189015	70774.3	194272	8.12654e+06	137864
O70513	99621.8	171435	201696	150159	124233	106448	141815	134711	97185.2	140320	141589	124745	135753	368004	136752	183104	162403	139768	352836	307912	286683	268549	182537	294387	1.12018e+06	364292	311369	253704	567934	348132
O70534	551237	1.1351e+06	1.27206e+06	882830	741102	483025	419250	304174	274728	323633	251592	189141	376982	348517	259793	316512	263206	159438	491080	418366	568131	369334	573576	494875	1.03837e+06	431186	558899	235853	521584	227783
O70535	121939	232880	199582	129955	334121	127103	209618	148022	145085	61027.7	80993.8	129559	231353	113357	149652	146875	127727	165049	220647	184541	255314	265342	221026	90073.1	280881	313820	152960	72908.1	527136	86458.2
O88204	30593.8	39190.2	93210.4	45430	30867.7	39924.2	23101.2	11067.3	13156.4	16776.3	9151.76	12467.8	15866.8	18417.1	18422.8	14886.4	21614	12633.3	30414	35736.1	52999.2	42941.9	35371.6	39475.5	342430	29024.4	39383.9	20023.4	8.61883e+06	22566.6
O88766	145173	190938	97207.8	174914	54378.5	85493.7	382532	307187	530631	527308	157078	368003	470633	308367	457989	339451	717353	403184	118958	58616.9	100611	46405.8	212046	267888	880508	189461	138083	145977	602481	107509
O88767	35405.3	19368.3	6276.63	28898.2	22170.6	29010.5	31685.7	46038	32148.5	31362.6	33002.4	31786.8	38183	68198.1	42539.6	44752.3	35155.4	38608.9	30085.2	23265.1	37546.5	22364	15195.9	15231.1	257801	9285.02	32252.5	31120.6	351504	19348.9
O88917	146561	202557	206999	192145	136124	133215	78493	90374.8	55337.1	76629.5	65119	69573.2	48998.6	72501.4	47930.7	68364	66503.7	50413.5	92504.8	137499	185182	186414	107783	134332	408302	93833	45344.8	42981.4	476953	41994.8
O88989	50792.9	46334.9	11073.7	54749.7	79790.4	84859.5	47852.6	93130.2	98718.7	54646.6	130016	70957.2	53990.4	122843	191458	163106	74535.7	112476	63815.4	84474.7	89136.8	94285.8	118973	107611	298250	86138.1	110968	53698.6	401695	60189.6
O89117	68508.2	14487.2	42105.7	70762.1	56285.5	68461.5	35108.2	33705.3	7127.37	55228.4	12786.4	51281.1	46179.6	55981.8	50875.6	25283.7	28646.1	44247.3	12312.4	19095.7	12446.1	27418	31968.3	47261.3	256696	13197.6	181739	187432	1.13684e+06	242405
P00502	168385	135164	377261	180969	125715	119070	296588	382736	530053	276851	610190	254746	279720	376297	594274	459405	360529	590731	292260	284004	248493	497515	393771	398241	653739	536722	645560	420260	1.98401e+06	436679
P00689	38420316	58026020	66896320	61535832	43662732	45719768	33821936	27402234	28803304	30756160	24306780	27875048	29843104	23640126	23010812	24127370	30711764	24208776	20156172	34773428	20232818	43663376	31638844	37091556	78005336	40187316	2.80309e+06	8.2856e+06	3.0533e+06	3.38572e+06
P00697	12825	17715.3	12671.7	7021.65	13101.1	20182.8	18345.1	23679.3	20498.9	45243.9	29397.5	6477.52	23412.4	19821.9	24649.1	28142.4	28761.4	12767.2	41231.6	91815.8	34172.7	32096.8	16911.2	29282.4	291215	21381.3	20184.6	13825.2	679274	26368.8
P00758	20351306	31689046	37729376	31443016	22209078	30050900	19271244	17061468	16472760	19200052	10604309	16933840	22022200	20126996	21476528	17842162	17583856	15691397	17088680	19159562	30096324	21353238	22501918	18961672	5897965	25726660	23570890	15364713	8.35207e+06	16655487
P00774	27598.8	4943.54	11958.9	6712.62	8210.39	5784.3	8239.4	6413.65	8521.51	9033.98	6129.42	4096.02	7893.23	11249	12421	4054.53	7132.67	1441.99	15521.7	9205.97	11463.1	9686.68	12424.1	41788	83271.5	10304.6	20997.7	20118.9	460028	18566.3
P00786	159174	152705	150138	189237	160789	141393	245924	199699	226198	330182	239212	173366	316806	423438	334364	269143	355459	168115	131673	113095	207228	184027	200308	225604	526664	299485	229004	254196	505665	200632
P00787	392496	656157	467800	384464	502203	368653	657699	1.13483e+06	917340	641884	896381	708022	1.36954e+06	1.43436e+06	1.21971e+06	1282569	943055	770932	401626	407058	417378	432720	764767	950749	1.021e+06	708757	1.49993e+06	764493	327629	528741
P00884	48923.2	6146.93	17033.1	24317.9	28393.1	25480.6	63084.5	91944	126433	64015	118424	73344.1	62379.8	127441	184301	126262	64349.3	113563	83126.7	29969.4	42065.4	64180.9	119001	76504.3	3.63734e+06	64362.2	154135	59561.3	626618	64928.2
P01015	95863.5	131151	129971	94117.6	127807	126990	411014	780727	701224	418944	1.04086e+06	552933	874312	1.55165e+06	965297	1.09493e+06	771192	520600	284552	385814	216505	182536	377209	688026	737060	282158	498276	512512	452540	321801
P01026	124898	282112	46952.8	132454	145511	194195	354270	346843	590263	347674	257824	288079	271754	489224	204418	206256	192901	167129	723833	1.34923e+06	649289	370107	435740	452925	843381	312478	273927	267136	532806	703177
P01041	21193.6	28014.5	41523.9	8520.55	18860.2	8005.11	52609.2	84550	74932.1	14213.5	71004.2	25057.2	26905.6	54476	60225	69484.9	20470	24649.6	39406.7	42199	44173	73798	45448.2	53343.6	312654	50366.8	63811.1	32809.9	8.4367e+06	32243.3
P01048	2761336	1.87499e+06	2.22005e+06	2.51317e+06	873394	838051	1326633	554259	844055	1.04269e+06	483811	430228	1.63251e+06	949248	746979	566557	987932	404484	1.86208e+06	1.33103e+06	1.6484e+06	968890	818802	871985	372928096	511965	1.10258e+06	860260	462709	693148
P01681	399073	368013	312882	982671	178152	538800	9612596	659751	2.48186e+06	2865583	634138	2.02174e+06	9693519	875110	1.67045e+06	920086	4.58026e+06	2.52259e+06	285975	320024	447739	149561	1.10617e+06	3.03512e+06	7814524	948642	1.99273e+06	1.55367e+06	2.15196e+06	1.06209e+06
P01830	84308.2	87266.7	112240	156094	77083.3	94512	157391	228706	194044	258030	164725	243097	328750	315715	210623	279275	210903	208479	75388.4	68977.7	115232	106462	241134	135923	1.55665e+06	189265	293413	115665	685109	89445.7
P01835	36437592	56854476	64955752	50616396	33572532	41233712	47901940	43518296	55729264	34284808	39796132	42108988	74099064	58208540	81899384	42593432	76869152	55231288	17878196	33107884	48857824	55487768	50543328	70779944	23791196	60576372	47999728	39110908	15672344	33666516
P01836	16341864	23355252	21503440	21984504	14298463	14703149	32595436	23044246	23991244	31410620	15210477	16616873	32115116	31021588	29670594	20912594	33306494	19109366	5808954	13737107	18856856	17786788	21191942	26736542	6292814	21040462	16040909	16146274	2552425	13429970
P02454	594168	1.6428e+06	2.40327e+06	925289	1088060	1.08664e+06	1.57216e+06	1.54492e+06	1.25572e+06	1.43912e+06	1.24856e+06	1.48418e+06	646172	2.96543e+06	1.20676e+06	1.7073e+06	1.69801e+06	1.80026e+06	1.32594e+06	971220	2119513	1.06119e+06	2998700	3219038	102087880	2.5496e+06	3.81886e+06	3.09298e+06	104728256	2.48604e+06
P02625	178555	113556	132023	158365	130286	85082.4	195419	291434	276658	160386	290775	133309	388448	404929	272552	125080	280048	211427	374725	94969.1	303041	49937.2	1.13124e+06	712802	2955703	205951	356670	275721	5627052	214634
P02631	31466.2	54546.1	80101.7	28829.5	72682.8	19236.7	22372	22468.9	31515.3	22576.8	54959.6	28639.1	28959.5	42778.6	35700.6	30224.7	13140.8	11913.3	32826.7	54853.5	50964.2	52255.7	88579.5	47442	506418	148590	55145.2	53835.5	8.17557e+06	44979.2
P02650	240959	313440	457447	163200	255485	118154	291156	233912	271415	241098	359004	248517	254234	312681	348811	632169	265397	276906	192118	175064	202973	268389	599934	318784	2631024	1083970	977229	363204	1.07773e+06	502608
P02651	65795.4	44848.3	75352.4	24230	52777.4	36559.6	52336.6	60337.1	58135	26703.8	45204.1	60076.4	41296.4	66791.6	59569.6	53162.2	27407	61593.6	72575.9	156670	83311.7	80693	111709	128913	169988	147047	70725.4	69542.3	381469	81282.6
P02680	19545684	32027606	16766582	12140254	12775252	27693998	19642496	22880216	28057006	21665630	22395626	7.21129e+06	9294893	87344008	36426512	54122560	26093798	28585598	16982354	27659982	42327744	32799258	43125084	78239960	4962235904	25903294	112367504	81421216	2806582528	33598776
P02761	3.6912e+06	4.39223e+06	8848908	3.12228e+06	4.05923e+06	2.69518e+06	163162640	449500000	460169184	211817328	451277856	321334656	626181184	1033491776	805375680	687662848	427014976	466963136	5.0966e+06	13598337	14437356	4006275	573519168	905164352	23595912	372509376	1279409408	711236224	33907368	360283616
P02764	800365	904500	995877	3.1951e+06	864205	683313	1.19422e+06	954263	1.5271e+06	1.55126e+06	1.29494e+06	1.28555e+06	1.80909e+06	1.08251e+06	1292337	2.04596e+06	2.0338e+06	1187847	371527	698412	660498	764209	1.97181e+06	1.83632e+06	316218	1.00034e+06	2282868	1.05083e+06	432379	1.09031e+06
P02767	161827	461251	484063	183937	181459	287464	246152	317532	329453	241145	316949	307926	353424	478695	355735	358164	256962	269758	411320	574057	681484	373393	645439	1.08712e+06	752271	1.2292e+06	652180	627708	335763	621636
P02770	34728388	56427972	47769524	32866324	33678024	44877688	38628900	36027424	38312692	34340980	35394688	39690316	48895004	32815988	31436592	31408260	34147240	29841982	107899032	118394104	84073744	59802472	56296548	64652496	21564968	58035036	58781248	56321672	7.85868e+06	83771800
P02780	21870340	13445172	16687908	17223472	34282820	40745512	5987670	13831595	1.97147e+06	2.87623e+06	16269910	25887868	9636698	12733909	10050917	21185344	7835891	45013400	40551244	24279110	25506914	16672154	17400122	9331071	2.04875e+06	28519562	8553201	40414892	4434331	19864812
P02781	21226222	12954250	25013824	21692308	39182916	63787068	12520610	21996806	2.41989e+06	1.72678e+06	23201278	37935956	9541041	17214260	12114924	24110418	7791502	58424716	50997884	26826762	22344770	19700834	16904884	42250444	11114322	26455408	15967786	36556364	51048984	15149224
P02782	15127028	15437075	18499786	15521357	21683758	40231176	7564544	17725734	1.89677e+06	1.15693e+06	14963308	27710330	6064394	15034915	8.08633e+06	17266548	5.00282e+06	47928416	34192272	19745428	22858938	14258541	11693647	24211130	327639	15755644	11104666	25559712	2.68682e+06	11709862
P03994	52468.3	62692.3	37013.1	72681.3	32960.8	43007.6	26356.4	18498.1	25782.9	26269.7	14367.1	24422.3	15331.3	7891.78	10705.2	17165.6	24530.9	23058.1	65673.5	47829.8	53260	71451.1	22863.9	19157.4	377245	28057.2	23692.3	14458	8.36156e+06	7656.62
P04073	333195	518642	303732	817990	500288	545757	188755	425774	226494	274189	209951	216879	146209	447697	233953	282406	389685	208368	341011	415524	463466	400385	225651	108039	1.90748e+06	209944	179356	86334	638220	87867.7
P04218	119288	169036	240531	151251	209566	157394	133993	138141	140072	133403	171882	225975	201717	198316	119841	187581	205234	184449	79158.1	90360.4	219690	181021	171734	69913.8	3.12458e+07	202833	122240	65380.1	7.84154e+06	84975.4
P04276	232233	394430	198003	190633	261123	323773	388071	383771	470439	398224	308659	527249	379584	355639	355780	370517	318043	376307	744702	1.2834e+06	642642	514004	615979	408293	1.29042e+06	680523	404998	626299	117796	950917
P04639	64670	66853	64457.8	54607.2	60076.3	50991.7	43545.8	34854.1	59588.7	31119.4	35844.6	25177.5	50366.7	46649.4	54586.1	18689.2	54942.8	20747.8	123496	148955	82276.4	105678	38922.9	56298.7	171554	88710.7	8382.31	30020	301008	68960.4
P04642	131485	147141	61986.7	145234	203977	184090	131002	164763	215777	164671	275027	232413	130813	194613	261531	196839	89614.5	144780	393126	325829	373525	311815	135480	145927	383472	107042	117087	97706.4	242213	133758
P04764	108687	64100.2	19809.5	112982	172291	158588	90099.5	168405	131250	129819	186067	138218	76077	161321	236052	275199	90519.1	161931	100965	105844	108938	126185	170742	189654	3.18353e+07	146689	204158	219063	7.76772e+06	204645
P04785	63415.2	50795.6	62119.5	58660	58703.7	58081.7	40028	46199.1	44204.8	36824.3	40683.1	51221.6	32803.7	47998.6	41599.6	44874.7	43740.8	41551.4	70834.3	45528.8	49783.4	58376.9	42711.4	60574.8	215735	39824.6	19613.5	29399.4	8.34461e+06	29493.4
P04797	32227.4	16356.3	22962.5	15056.4	43592.3	44066.4	71580.2	93503.5	73180.8	79260.1	137436	75205.8	26615.8	97183.3	99363.6	110283	47472.6	116318	42765.9	31584.3	25349.6	23099.8	38097.4	85248.1	243493	39012.9	202927	107476	1.36931e+06	84848.2
P04906	15053.7	6049.88	13419.9	14508.9	19999.5	30425.7	37841.4	33015.1	35265	42196.4	69046.4	52331.7	52077.9	59083.8	62685.6	65826.1	49061.6	84938.2	33848.6	20097.4	19607.5	21773.7	21002.4	24519	75112.2	33585.1	130319	120459	56718.6	153087
P04916	71754.5	130358	322598	95145.5	84628.1	134359	102310	215262	780329	104573	118706	283894	152750	386492	1.20865e+06	164246	101560	310692	208586	252413	230227	183238	323708	220613	143566	197721	465980	188312	350559	208351
P04937	3.28614e+06	2.89922e+06	5882558	5.38684e+06	4.09491e+06	4566901	4.04431e+06	2.4797e+06	2850262	3.24898e+06	2.05576e+06	3096480	2965721	2792004	2.58625e+06	2.64403e+06	2.92933e+06	1.97114e+06	2.94704e+06	3549105	4033645	4.42187e+06	4.32094e+06	3.20927e+06	8519698	3.82818e+06	5.35297e+06	2.19766e+06	16638215	3.91368e+06
P05371	456585	99068.9	270151	524066	317558	481288	429045	266394	170744	327254	227183	416241	448602	415414	248202	339880	456461	382979	131766	502613	411227	364500	169711	382488	147839	1.12669e+06	129533	297460	419946	488416
P05539	21350.8	34835.6	38239.7	23919.3	20720.4	12761.1	10499.3	5096.87	7961.64	5797.03	3021.62	3024.28	10799.9	32355.2	11851	5981.65	2115.91	3400.41	14308.5	11739.3	16903.1	8965.04	4818.23	9588.12	168623	6377.85	18299.5	9141.99	616945	8760.12
P05544	2.07798e+06	2.8631e+06	1.38832e+06	2.50075e+06	3232919	2.61886e+06	1.70709e+06	1.66878e+06	1.3018e+06	1.33933e+06	1.25511e+06	1.27993e+06	1.87425e+06	1.62276e+06	1.82006e+06	1.92314e+06	1.70376e+06	1.45782e+06	551693	1.02558e+06	388368	714917	1.28265e+06	1.4345e+06	1.41971e+06	1.39317e+06	2.53197e+06	2.06568e+06	2.04163e+06	2.1128e+06
P05545	4038233	4956092	1.84261e+06	3.91064e+06	4.90014e+06	2.97577e+06	4.08873e+06	3.04506e+06	2.04185e+06	2260670	2.71115e+06	2.08078e+06	3760601	3121972	2862023	2.96435e+06	3.68889e+06	2.38793e+06	1079862	1.67241e+06	1.05828e+06	1.03682e+06	4530350	2.54707e+06	4.69446e+06	2.50262e+06	6.85862e+06	2.18077e+06	9250104	2949459
P05964	76476.9	147603	108880	59886.1	66562.4	88230.5	102336	147279	95605.2	172819	255845	137918	135196	385082	102911	109652	100170	168093	246988	156947	128079	263339	182640	321754	1.02717e+06	243406	170982	162038	353888	313883
P06399	16368.5	38486.5	49348.3	25543.2	22707	21044.4	51991.4	51785.5	191655	44560.1	23867.7	23363.8	11986.2	43489.9	26830.3	19589.9	20949.3	6296.52	4906.74	33253.5	49057.1	8748.15	23762.2	26154.5	344572	28127.7	67072.3	7079.72	872757	47693
P06760	128409	115517	576336	98553.2	134703	91861.9	133122	180949	670164	127269	844927	53106.7	586737	136533	1.44987e+06	2.2597e+06	476934	389679	200687	1.812e+06	1.23538e+06	120585	294388	3.5901e+06	4.42967e+06	5.83145e+06	2.96758e+06	3309728	6436804	4.3121e+06
P06761	106635	101083	120585	87146.9	137733	111406	369254	502954	298869	247476	310267	296176	419041	691031	347520	612650	579931	380354	224398	77805.1	252869	48562.7	880263	388029	1.21947e+06	54793.8	398286	224234	1.3272e+06	79285.5
P06866	20065.5	39698.9	74012	36513.4	34526.3	23549.2	170813	321971	967615	187650	517618	216581	251871	306294	517542	824200	208958	147523	192786	258484	167013	170888	415486	385413	446059	177029	342229	397364	249060	537244
P06911	180688	93617.5	446988	212796	46053.2	88946.1	43955.9	92060.6	20092.1	91051.3	69913.2	35702.3	8668.01	66504.4	24345.3	58222.2	79400.4	27772	221276	395425	265152	16850.9	20443.6	129648	1.17077e+06	12717.6	132614	92204.6	1.1128e+06	63450
P07150	40137.9	20192	25003.7	24883.5	29364.8	31743.4	84272.2	39108	62905.8	118518	42915	34645.3	53323.6	88792.2	50240	50355	61109	39425.8	86140.2	31012.1	46846.7	29474.2	53914	48865.9	274903	55858.8	30770.8	43164	615989	77687.9
P07151	448975	528623	749400	550239	612704	524809	1.07965e+06	3.60142e+06	2.81772e+06	1250376	2.73257e+06	1.87544e+06	2.85148e+06	5574850	2560122	2864101	2.09099e+06	2.12988e+06	517407	782046	775348	491840	1212229	2.33332e+06	2.17812e+06	734440	900368	1.04779e+06	7.87952e+06	991262
P07154	232413	202854	373233	303944	224856	276747	103845	67827.4	87813.6	88546.7	63170	88760.7	116533	83452.8	68307.8	100528	110773	97655.4	201794	152825	316444	227858	151612	156384	480428	190204	255641	127274	1.23994e+06	139397
P07171	249286	719288	436898	332398	385072	402109	206222	255408	284240	238771	454455	132095	86583	269989	97541.4	143812	52850.4	55448.6	359520	306722	309687	276869	295652	411251	1.6294e+06	371722	199354	1.01199e+06	635689	588180
P07314	777497	400272	568553	479174	503881	580834	895968	921475	1.50722e+06	1.17393e+06	1.02794e+06	1.01814e+06	1.31867e+06	1686273	1.87648e+06	1.8085e+06	1.37126e+06	1.71432e+06	682466	679593	745095	718787	1.26708e+06	1.34167e+06	382584	982381	2.34192e+06	2.64959e+06	2.04446e+06	2.43729e+06
P07340	104003	53973.7	114899	92184.7	93463.9	85679.1	59414.5	102633	74996.9	86693.2	95116	49734.8	48423.1	68670.9	49772.9	58922.6	57245.1	71222.8	111623	103364	140752	105588	99658.1	110250	344692	39861.8	61837.8	117527	678123	85502.3
P07483	203743	234907	469923	303667	347671	196739	52895.6	69156.5	46474.6	58046.2	41968.6	40245.3	57112	62792.8	66965.6	60974.6	35400.6	39101.7	193126	314904	355845	318961	94597.3	86788.8	442594	132849	137279	144968	1.03597e+06	109861
P07522	15210708	13819094	10060423	11435739	15612624	15010468	10853707	8750332	11054380	9553436	9324992	10291219	11233948	11195476	11438027	10182667	11292116	10115525	15041088	15026112	24419304	17266102	14092511	17230504	6.48714e+06	16793752	12967716	14777094	7874621	9976009
P07632	3.09549e+06	3.26526e+06	3.865e+06	2.74201e+06	3.9631e+06	1.51821e+06	3.83936e+06	2.94132e+06	3.32429e+06	2.99402e+06	2410312	1.8743e+06	5675941	4.71161e+06	3.60149e+06	3.9519e+06	2.45825e+06	2.40759e+06	2.25625e+06	1.5136e+06	2.663e+06	1671968	2.95046e+06	2.06676e+06	606462	4891952	9091999	4.52607e+06	2.61247e+06	4451843
P07647	2.10857e+06	1.16221e+06	1.50134e+06	1.69531e+06	2283722	3.82711e+06	1.45854e+06	3189297	395346	313325	2.929e+06	4500265	1.20067e+06	2.16113e+06	2.08016e+06	3.50663e+06	1176850	7551269	6399457	977074	2.08913e+06	1.66885e+06	2.55489e+06	5275725	1.22455e+06	4.60288e+06	1.88559e+06	4964178	1.10206e+06	2.52888e+06
P07861	348763	205934	148349	206219	238004	400054	295826	636488	197436	303190	724983	642939	250460	594671	232835	446727	286737	1.21371e+06	276282	253496	358052	233119	333898	493897	433224	376700	985711	710811	1.32767e+06	535604
P07897	1148013	1309401	2.23181e+06	1.67209e+06	1.2125e+06	1.13226e+06	890570	639745	572999	729808	540324	615284	677275	545622	511325	452971	553412	447452	1.40513e+06	1.35281e+06	1.9186e+06	1654991	1.0256e+06	943741	148604	1.13709e+06	1.11542e+06	614211	767947	883194
P07943	31115.2	55231.5	88914.7	50494.3	38654	89810.4	77724.9	38610.8	53825.1	42083	35229.1	39163.5	38645	68683.4	45392.3	24526	37577.4	52383.8	35822.5	71244.7	21225.1	85568	32372.5	37788.7	132603	99841.9	37867.7	32265.3	94485.9	44664.5
P08010	41907.1	32049.1	16523.6	26548.5	31364.9	65854.4	13148.7	25945.9	17982.8	17708.2	30136.8	29623.7	14176.1	24899.6	26508.5	21328.4	16100.4	37150.1	59591.8	53004.9	60333	35100.6	17762.3	51209	377245	35225	13483.6	43885.7	384045	36603.8
P08289	70449.7	94994.5	23059.5	31938.1	24447.7	84001.9	168840	127287	142877	78293.6	125724	162080	111635	143982	112827	99137.4	102736	200414	128629	93403.2	159023	96107.5	97797.8	58581.4	3.51408e+07	70914.5	177678	178354	8.09274e+06	136362
P08460	277740	326438	506215	349469	275808	286975	217481	270842	314390	175485	168816	239689	210689	189343	277878	139360	197998	194651	235211	293242	316278	248970	282288	225628	1.37053e+06	334476	218242	228170	1504619	232291
P08462	38382.4	632.27	8687.68	25659.3	20200.1	33496.9	100392	33340.2	66312.6	80134.1	38417.9	32350.2	125423	64099.1	85609.3	52009.1	82420	84406.1	38733	18653.6	9847.62	14702	7811.04	53727.9	134212	34924.2	97966.7	47292	142380	49768
P08592	494815	515251	802515	753418	562469	579832	434256	243750	284920	441681	176909	264259	486371	194340	329769	236038	385129	234852	344226	443820	609520	648925	356535	237398	179798	478300	643458	432327	354780	522570
P08649	1.55003e+06	1.94941e+06	1.43412e+06	1.65807e+06	1587182	778919	1478789	1.345e+06	1.14411e+06	1.95751e+06	761068	965422	1.17192e+06	2204448	1.08314e+06	1.39397e+06	878877	833002	1.30184e+06	562701	924662	751802	1.30667e+06	550237	343644	853250	2.76937e+06	1.14234e+06	1.37771e+06	2.18296e+06
P08650	6316.34	3673.99	3246.39	6358.54	6852.2	7968.65	11966.4	15500.2	16814	8824.25	8485.84	10732.7	11452	18881.5	18407	10330.2	12519.3	12208.6	13325.3	11225.4	9988.55	11765	6762.68	17268.5	278372	28055.5	24805	29220.8	460028	20770.5
P08689	48075.3	47982.1	36077.4	35577.6	23299.2	26063.3	17331.5	6332.55	7142.55	31575.8	21185.5	19559	14047.4	21261.2	16768.5	13067.8	45439.1	26584.3	44878.9	50091.9	69600.2	27236.7	15653.5	18499	257801	14977.6	25875.1	5551.07	8.35643e+06	3885.59
P08699	20436.9	30624.6	28830.1	17263.8	17437.8	8148.84	9889.67	10595.2	10020.3	18173.6	24876.1	44848.4	11553.6	16426.8	10411.9	8373.1	14609.4	7778.22	63024.2	12190.5	26083.7	10157.1	11947.8	21436.4	257801	6196.3	14982.6	12795.6	616945	6758.22
P08721	1.15737e+06	1.08967e+06	940167	1.18657e+06	738094	1.14577e+06	1.73341e+06	1.57127e+06	782191	2.28786e+06	1.16575e+06	1585119	1.97036e+06	1.68584e+06	1.69814e+06	1.62926e+06	986947	881749	1.5223e+06	2.79946e+06	800968	2.59544e+06	1.55114e+06	579547	742415	664306	7834423	3.58694e+06	5.08849e+06	7427182
P08723	2.40727e+06	1389712	932475	1.21337e+06	1.9146e+06	5.75572e+06	498755	2329297	270076	291978	1.5523e+06	3486858	709385	2.32867e+06	1.28782e+06	2.00985e+06	498924	4.91555e+06	6.2367e+06	3152009	3.66993e+06	2.63925e+06	2.66267e+06	1.59538e+06	1.04509e+06	1.81828e+06	1.26195e+06	3.90441e+06	645909	1.39673e+06
P08932	1.54486e+06	693465	816363	1.40983e+06	412973	358935	587660	331818	470265	547565	302164	307641	779554	303981	396077	351733	484141	255779	724326	738408	647448	385948	313198	328067	2.64203e+06	262875	319879	159058	5551667	188400
P08934	38009.1	43506.5	30143.3	30780.6	24372.2	29973.1	53115.4	8899.83	56944.7	33663	7564.54	36210.2	41816.5	67787.3	9971.7	11550.4	22080.8	16852.6	46470.7	61497.6	39100.1	38626.3	28042.3	14113.1	331488	44560.4	79819.6	28458.8	1.40628e+06	90420.1
P08937	357852	210705	334714	193046	175419	120622	744948	294484	363048	463594	308851	295596	1.49736e+06	498545	283898	648907	484347	237259	202235	138368	275284	143654	377698	329613	1.43453e+06	328544	110635	154732	283942	108622
P09006	126535	187764	71555.6	112108	115754	152733	185120	242546	339025	244401	287358	298138	290673	262522	298764	273971	256070	253131	472846	438650	333990	253268	311295	351106	543793	227433	331121	272458	201875	399757
P09034	18458.6	18455	11765.3	9945.73	13201.8	11537.2	52212.8	70206.4	85755.5	45795.4	104559	67245	103393	104496	93894.9	98106.1	41945.1	89012.8	12083.8	14150.2	31625.7	27412.9	50634.7	40954.8	338130	24966.2	47731	31548.8	612491	28673.9
P0CG51;P62982;P62986;Q63429	147074	119235	213430	100501	108580	142264	177463	161689	187634	190663	191613	191893	306857	325323	205407	180311	212529	258772	296427	170649	218197	131485	212049	276581	109204	196746	734674	547378	306846	382061
P0DP29;P0DP30;P0DP31	199305	288894	353774	209139	295733	186954	98868.5	121218	81056.9	73234.8	125905	91617.4	76173	167887	119910	73711.4	128263	146725	332785	290672	312401	312789	111570	219368	796348	151417	250739	149475	1.43046e+06	191056
P10111	43172.4	50804.8	35520.3	34558.5	41443	53274.6	27882.5	39816	41525.6	37550.8	66479	34667.8	31765.4	58270.2	51026.3	31606.6	23251.4	59597.9	57278.6	49567.1	59693.4	54828.5	22574.7	49934.9	299361	18532.4	95953.2	23584.6	8.36354e+06	18539.4
P10247	228167	347174	336496	319876	184387	185034	152135	123705	236116	292243	127205	258353	268061	264275	163521	22514.7	211642	166703	165000	227406	344254	162632	192506	238135	1.20428e+06	152824	656860	205718	834562	325177
P10252	515524	568552	1.08062e+06	729249	567688	554037	306280	197179	352070	408440	192828	221476	494914	163715	342204	274746	392438	186527	312545	444085	592702	777934	183672	513611	101215	700689	293917	295973	721132	391874
P10719	38182.8	47957.5	32989.1	11729.7	46000.1	6038.86	15826.6	41339.4	36258.3	18244.7	61261.1	91122.2	20107.6	44440.9	27383.5	34822.1	23264.7	65206.6	97190.9	21224.7	30121.4	50981.6	27999.8	75187.9	248086	20963.2	46804.7	26229.3	8.09458e+06	32315.5
P10758	27298.2	71786.7	13640	33234.7	24563	10836.6	109206	175241	95817.9	130035	130836	122198	230475	216095	197870	275437	189495	194700	181347	4299.44	27558.2	17431.6	127633	59611	3.43874e+07	26722.3	94054.6	59891.4	289787	20630.6
P10959	189646	720872	290056	164645	568734	168837	340610	726786	507544	273027	1.21439e+06	269028	403573	832143	657182	1.20942e+06	331500	254620	512582	375894	302988	525604	855244	485692	811937	791331	457426	329382	1.27875e+06	686862
P10960	783135	1.0912e+06	1.63788e+06	1.0074e+06	883629	900920	723310	566220	507440	712001	486618	578836	609263	758902	638548	590180	641607	511612	832656	806040	1.05346e+06	1.11137e+06	1.21322e+06	796987	1.38606e+06	1.45799e+06	1.26028e+06	824304	2.55634e+06	923548
P11030	59155.4	45923.6	97470.5	63926.7	49396.8	56450.7	49241.9	61912.5	42575.7	51465	49199.2	45504.4	53617.7	81662	95078.8	79352.9	42454.9	100989	51536.2	50550.5	66850.7	45716.7	37477.5	79362.9	620062	55712.9	115794	83980.4	2.54965e+06	98240.4
P11232	289091	395904	466132	303331	298425	245278	316520	280604	226732	318801	286568	255121	446680	393807	347656	298401	273793	293643	266827	216183	311458	210422	427818	753260	1.18011e+06	550434	490454	321975	677086	408874
P11980	18568.2	7163.81	9004.93	8330.03	29779.6	17990.6	28396.2	29786.7	31377.9	26409.5	37541.4	27522.2	26219.3	24384.7	39474.3	28261.9	29161.1	21721.5	31409.9	11924.2	23234.7	16757	56354.8	55029.1	257801	46492.9	73377.5	42528.7	351504	56968.1
P12020	221870	67601.7	2274651	452865	110095	253806	16762.3	47599	22535.6	27738.4	42313.8	15796.3	28751.5	169611	68271	86176.7	83587.1	59390.8	581573	1.02848e+06	1132170	118719	63664.2	148823	1.1782e+06	175174	46709.6	96741.4	556451	26959.9
P12346	2.84235e+06	5573465	779453	1.82451e+06	1.93195e+06	3.17739e+06	3842195	3314782	3.83705e+06	3.90858e+06	3.53457e+06	4751507	3.98645e+06	3.41459e+06	2.30243e+06	2.25904e+06	3.30164e+06	3.35057e+06	11494596	16077833	10515180	10790825	4.00046e+06	5.81578e+06	984465	3.54031e+06	1.138e+06	6.48479e+06	498649	5.88457e+06
P13221	47727.2	87536.8	64840.8	52987.1	61178	40603.4	36371.9	34946.8	37388.9	31643.2	51997.3	38893.7	33715.2	32726.7	56632.3	33965.5	30014	34176.4	83589.3	75457.6	76659	91949.5	60565.5	68325.7	71825.5	95230.7	7062.77	38148.6	8.09736e+06	28962.5
P13596	134649	138366	184350	214367	86380.9	133884	86829.5	63110.7	66970.1	94726.2	38811.6	61117.2	62150	45627.8	45000.9	38450.7	45991.2	44256.1	113984	96173	117711	153278	87092.6	66192.5	525770	68383	68654.2	30850.3	772514	30863.2
P13635	294672	515686	244128	241002	265801	276889	329093	344889	447784	309080	337622	384004	402051	352117	353231	314922	338376	321523	798986	701408	544617	511570	590354	671674	976314	626921	254116	570682	384058	678545
P13852	53353.7	64522.6	114972	92926.7	90698.5	82144.5	54978.1	70048.2	68530	33244.5	47971.5	41275.9	115744	88400	43828.3	52716.8	45411.1	42965.5	66015.2	74503.5	86696.5	85176.1	76607	88011	189598	86004.3	158952	70301.8	75708.1	62360
P14046	778845	801980	835305	511808	622058	713952	1.03525e+06	674016	1.028e+06	628220	805177	639152	1.13252e+06	669664	711338	825301	626031	671860	521689	687195	757597	507387	854521	1692522	2.42393e+06	1.09176e+06	1.96116e+06	1.7503e+06	641698	2.57846e+06
P14562	116250	78154.1	171989	156430	115790	105393	116435	88105.2	92305.7	137450	104473	76101.8	140969	94715.2	114361	113298	123631	88343.8	117151	115288	168979	144486	108712	162208	3.1207e+07	142350	150432	159212	7.89587e+06	131582
P14630	226430	87680.2	483014	271565	233699	250768	575411	400659	487825	611178	373808	484483	649740	131641	616835	475081	732196	429142	219535	149928	286400	223303	665323	484391	449927	767075	898388	444796	854428	649770
P14740	892782	720718	933625	830915	719842	824686	790533	1.0064e+06	1.16038e+06	1.22565e+06	1.10332e+06	1.02759e+06	1.19042e+06	1.35657e+06	942897	1.22156e+06	1.21399e+06	1.28619e+06	546714	541982	826107	664023	781285	1.22207e+06	1.00994e+06	1.08818e+06	877326	1.12807e+06	899663	814261
P14841	1.56974e+06	2.50302e+06	2.43184e+06	2.17931e+06	2.11946e+06	1.31396e+06	2.36301e+06	2.24165e+06	2743594	1.31048e+06	1.24337e+06	1.07185e+06	2.27217e+06	2.74415e+06	2536354	1.97184e+06	2.24266e+06	1.39713e+06	1.36669e+06	1.08305e+06	1.4661e+06	1.4863e+06	1.47879e+06	1.13765e+06	4.5802e+06	1.75413e+06	2.52608e+06	1.11487e+06	1.10826e+06	1.60832e+06
P14925	99088.3	114973	107007	102003	111998	99819.7	120250	145894	125573	99061.7	98005.9	125183	142491	96974.7	129291	139333	172369	112094	127782	132471	144397	136073	165051	115414	154386288	167654	66883.7	90226.2	37712832	93725.2
P15083	892757	565026	831888	579458	1.12297e+06	1151913	1.12559e+06	837219	760060	667607	891709	1.1044e+06	1.09717e+06	969309	1.35958e+06	1.41766e+06	2.22586e+06	1.2113e+06	833602	477928	816110	528410	1.19252e+06	1257567	2.07364e+06	1.29594e+06	967036	1.05829e+06	964212	1.0954e+06
P15390	46985.5	75844.3	89357.7	51410.2	56020.6	52154.9	109745	118763	143089	56793.6	121567	116426	131796	156178	183624	125185	117663	144136	57987.5	34855.2	76907	74793.2	154972	202513	3.66092e+06	135596	232768	219158	228186	170422
P15399	310363	82911.8	47822.4	114484	389861	233301	1.78402e+06	1306278	94165.4	410613	1.10746e+06	1.79904e+06	668305	14399783	1.83052e+06	3.42486e+06	2.30867e+06	416903	2.00825e+06	1349361	1.3499e+06	2.09986e+06	8531473	6793405	469549	2.21761e+06	1.37933e+06	2.78356e+06	227025	2.30144e+06
P15473	122153	205412	302821	192997	190296	111406	107369	60187.7	61070.3	99544.3	34416.5	23953	40526.8	87832.2	63943.8	98239.8	51389	26844.5	54511.1	65917.9	220792	121496	39628.5	41005.9	384085	63351.1	123212	64313.5	532330	131133
P15684	1.08252e+06	1.16919e+06	802341	1.52949e+06	1.01992e+06	1.22274e+06	1.18527e+06	1.4639e+06	774850	2.17302e+06	1.83617e+06	1.16028e+06	1.1483e+06	2.08507e+06	645692	1.28936e+06	2278032	1.86909e+06	1.87074e+06	973293	947802	967324	1303286	632879	307235	797703	2128669	1.04508e+06	258265	920237
P15693	9211.33	6631.42	24286.6	4174.69	41135.5	13875.7	11606.5	8406.56	6420.03	11059.2	3307.13	8446.6	19143.8	49193.5	15531.7	30700.1	10088.1	11873.1	168670	9483.97	19177.4	14082.5	12594	79657.9	342017	16379.6	36317.4	5056.31	613456	15067.9
P15943	71390.1	68501.6	100446	86758	56976.9	26936.4	63691.2	47223.3	64574.6	81370.3	47122.3	45679.8	80528.9	49813.3	65662.1	58810.8	58415.2	41009.4	119358	53846.9	99372.3	84028.2	43987.5	41016.7	131631	27862.5	78514.2	61807.8	87712.6	53901.7
P15950	4.52338e+06	7764194	9036838	4.13262e+06	6.79833e+06	7206347	4782907	4413320	5147730	6.16675e+06	4062455	5.7635e+06	5.90331e+06	5.25517e+06	4585528	2.50693e+06	5.4759e+06	5507912	2.40206e+06	2.57491e+06	2.63974e+06	4610812	4094482	2.66365e+06	6.81013e+06	5033253	2.20746e+06	4.20108e+06	7.08443e+06	2.97578e+06
P15978	174471	148235	40087.1	97459.8	84101.4	60715.8	391822	302886	28769.7	247371	292690	224603	503652	444889	40103.9	389622	310867	268787	289326	299498	256933	245709	517214	399274	1.53894e+06	501299	179620	520115	689800	178121
P15999	33827.8	23754.6	11342.9	35057.8	34652.5	30393.9	11487.6	22961.3	5511.51	9060.66	36595.6	25322.4	25510.9	45701.2	17336.1	18546	6929.49	39104.8	127031	37562.4	271258	33850.2	18604.3	19922.8	244772	18208.9	31486.7	13403.3	472266	13629.3
P16310	47605.1	73425.3	113001	81619.3	55153.1	57357.4	42705.4	58627.8	74991.9	40794.1	29057.6	39052.1	64364.4	37794.4	46664.8	32878.4	53423.4	33292.6	55328.2	83660.3	100680	70423	53885.8	67501.4	204749	41092.4	44735.2	27671.4	8.18794e+06	25697.4
P16391	205427	227341	188163	169950	131362	70868.2	135969	180611	162703	82759.8	148823	126481	167460	164945	119704	191350	98749.9	104264	238498	116741	173294	220398	186817	373406	194648	191453	177029	380392	158947	196699
P16573	2472886	5.66037e+06	6279098	4.31893e+06	2966824	3.28024e+06	3.69004e+06	7.2104e+06	4.88925e+06	5855550	2.64323e+06	3.45181e+06	4.50505e+06	9158261	4837810	4301647	5.22318e+06	3.48786e+06	4.21428e+06	3819883	7982505	3.29381e+06	8914438	13426377	5.91807e+06	8.31198e+06	3.15528e+06	4137257	4.42682e+06	2.47197e+06
P17046	88146.2	70384.9	128353	87985.3	112892	88462.5	80151.4	65385.9	56149.4	72666.7	116082	59866	68803.3	67778.5	81758.3	92097.9	89937.5	67396.7	80525.5	79205.3	106529	73898.7	69445.9	124707	446943	149326	197800	148624	1.17014e+06	133806
P17164	170301	108820	57979.5	129835	203269	236060	349985	386684	482361	380996	375033	370514	415489	403131	469478	324033	373681	325416	165356	176053	131780	185437	304617	414077	1.14432e+06	309072	39140.4	50152.8	664380	112005
P17475	1.49562e+06	1.36986e+06	1.22617e+06	1.50463e+06	1.85019e+06	1.81719e+06	3660311	3.57414e+06	3.85663e+06	2.85138e+06	5623386	2.8837e+06	4808576	3.9665e+06	3772959	5.18219e+06	3291195	2.40769e+06	3.70145e+06	5.20544e+06	3.92228e+06	2758382	4486617	3321958	1.30517e+06	3.57058e+06	4.03995e+06	4280297	1043093	3805306
P17559	85891	639537	942301	101702	308589	103342	196729	334954	375071	319649	170064	122020	181782	253042	166094	130428	164295	63940.7	259844	36572.5	313412	82813.3	279025	199429	2.61413e+06	224548	86941.5	27451.3	173052	165617
P18292	6193645	9200735	10988551	9342808	7512858	6.41205e+06	4.49575e+06	3.91051e+06	3.04621e+06	4.47493e+06	3191437	3.55817e+06	4.04342e+06	4.64757e+06	4.1276e+06	3.34485e+06	4529131	3.40374e+06	4911691	6.80801e+06	8975127	8848586	5.03121e+06	1.88185e+06	2722274	5573913	6741620	3.58963e+06	4.01902e+06	5.81815e+06
P18418	6486.32	17859.8	16028.7	15240.4	13608.4	6018.02	10117.6	15081.9	15513.9	11312.3	12665	12187.4	8729.84	20535.1	19580.9	17528.4	14756.4	17245.4	4089.47	9581.25	3405.55	12428.1	15396.3	33159.9	300457	12981.7	17661	21378.2	616945	21000
P19112	28927.1	26794.5	32467.8	15566.9	16423.2	24187.7	30776.1	53383.9	58905.7	24892.1	81969.8	45299.3	40179	85818.2	109748	87634.3	40042.9	84262.9	47597.7	25210.2	45924.3	81601.9	48819.1	61866.1	291073	45350.4	122315	58137.5	1.04603e+06	58002
P19218	292236	376161	1.05655e+06	88784.7	546465	390107	151868	147962	384567	64772.5	139412	89271.9	345663	197506	784532	173129	117222	271873	195650	345266	369902	155456	117505	173512	1.3769e+06	233935	287653	178101	908388	284135
P19468	46834.9	29495.3	57860.4	20245.7	22390.1	34622.7	64338.3	91000.1	118434	89161.4	193520	113408	58206.7	105654	92853.8	109134	62743.9	140358	37960.2	33629.2	37620.5	43873.6	73488.3	86660.4	154105	71009.3	257837	81421.4	277066	113059
P19804	38566.9	49536.9	76943.4	33106.1	45435.5	39993	33166	57516.2	75308	36901.2	81791.5	51276.7	38608.4	43332.1	61815	85830	44590.4	79890.2	96665.2	52299.4	112010	73986.1	65159.3	77025.2	309796	59098.7	69238.2	77554.7	842931	44897.7
P19939	127111	24507.3	91448.1	74793.7	86537.1	49230.4	177137	71287.5	105586	155557	104228	102502	259121	99122.4	265756	173758	174814	144848	37952.9	35821.9	63498.7	40015.5	99141.4	86460.4	3.50887e+07	91708.8	98426.6	128981	7.72924e+06	219171
P20059	846470	2.10241e+06	1.28851e+06	2.01693e+06	1.21733e+06	536476	3832510	6.58732e+06	8.1797e+06	4483147	5983208	5943243	4.92541e+06	6427240	4650404	9874187	6.03173e+06	3.83195e+06	591293	533268	287453	722362	3.83412e+06	5265128	1.77686e+06	1.43457e+06	1.9963e+06	1.06193e+06	1.76372e+06	1.9594e+06
P20611	2731845	2.15671e+06	2.139e+06	2.68117e+06	2290120	2670803	1.93915e+06	1.47249e+06	2.15324e+06	2232299	1389174	1.84485e+06	2.23067e+06	2162110	2.06026e+06	1.80761e+06	2.73543e+06	1.78464e+06	1.73843e+06	2.51815e+06	2795676	2.55438e+06	2510409	2902367	583824	2.26723e+06	709147	2081585	172418	1.14669e+06
P20759	175078	205150	222417	194117	146651	139413	250222	563884	852857	573628	250957	95213.5	198896	852613	694109	441400	588561	186133	322859	452288	813513	499742	2.11802e+06	979748	894425	1.35987e+06	937856	690369	1.07779e+06	1.38355e+06
P20760	1.1547e+06	1.49836e+06	1.84999e+06	1.26608e+06	805534	890235	2791655	1.26209e+06	3.63101e+06	2646451	1.23649e+06	1.19729e+06	3.65304e+06	1.75979e+06	4.6962e+06	1.96552e+06	3.69268e+06	1.52205e+06	1.81811e+06	1.0975e+06	2057736	1.19044e+06	1.12132e+06	555091	1.57593e+06	820328	1.09505e+06	761711	955254	967231
P20761	135307	167794	115668	191383	71220	165027	771192	797445	716511	527403	837148	606051	943388	1.04559e+06	424707	1309394	470039	476462	336334	365377	619448	350254	295966	544616	213309	535125	321192	389950	201821	835282
P20762	771015	168870	441956	177045	184431	181985	854678	322014	737436	528205	422328	575916	766037	531988	426926	474050	450700	387809	787548	783903	1.2278e+06	562142	1.00513e+06	908153	1.07736e+06	511299	507408	600905	327270	359798
P20766	31474.6	55564.3	64638.4	47799.8	25159.1	54797.7	129532	68457.3	154757	62940.4	124900	96518.8	142051	76338.4	115893	171629	85934.4	84262	170904	26129.6	63554	106195	116781	200839	378055	63196.9	49086.1	42148.2	743770	54607.5
P20767	3542748	8.25632e+06	13334299	10513990	5366410	4602190	17787186	8407005	16704319	13309186	8838742	14216503	25794348	8270051	20747888	10368398	22689138	13698181	7.59107e+06	7255935	10625595	10083362	13555314	18237688	30384790	14049051	6.58051e+06	12619138	29662062	11895718
P20786	314120	360595	336578	424140	301079	392130	286160	216772	208495	262457	128678	196885	202980	215028	207926	210463	221424	203273	328291	320822	201592	411920	258946	195092	1.30119e+06	336190	444523	223051	2.22252e+06	364072
P20909	43057.5	82186.2	57180.5	59847.8	65078.1	37913.4	20517.3	8363.07	37691.8	14091.2	6829.52	5669.86	25654.6	2920.09	16994.8	7736.38	15264.4	4664.05	19619	23199.4	52770.6	12516.5	21205.6	17241.1	377245	30692.5	21690.6	18150.8	377070	17612.2
P21581	28037.6	50525.7	59601.7	46617.2	42440.4	34359.4	23908.4	19852.8	12588.8	22049.7	16432.2	15138.4	22685.7	19677.2	24030	13953.2	29573.2	17541.9	40351.5	41599.1	33638.8	31527.5	18711.3	25498.5	377245	24820.7	25424.4	11831.4	377070	12403
P21704	5.21833e+06	1987290	11188284	5.61223e+06	8.21431e+06	9039428	4.67719e+06	4054872	4873215	5097717	4096508	5.43269e+06	7034800	5662410	4614762	5.7192e+06	6384664	7015921	6.25249e+06	9518939	10821360	8492697	5573833	6.96781e+06	4.0727e+06	10260100	4460548	7.50997e+06	2.02789e+06	5953460
P22057	1.55686e+06	2.34001e+06	3.18478e+06	2.28249e+06	1668978	1.6368e+06	1.78167e+06	1.88273e+06	2.08316e+06	2258515	1.22647e+06	1.69323e+06	2651180	1.99863e+06	1.43567e+06	1.47995e+06	1.91095e+06	1.53611e+06	2.13727e+06	1.07344e+06	1.59076e+06	1.32433e+06	2304672	2.08688e+06	6.53913e+06	974859	2.01252e+06	1.65089e+06	3458912	993784
P22282	3649405	4453548	3305349	2.35428e+06	7763592	10311389	5.15381e+06	16512838	2.27609e+06	1.84213e+06	10343926	16923452	4549544	6593582	5393789	11406102	4435893	26147822	19027062	8857078	10895514	7319848	8124691	23326664	7.37754e+06	10429197	3.82909e+06	25244050	4359882	5.9819e+06
P22283	2.02412e+06	1.24972e+06	990440	1.57549e+06	4121028	6983488	1.68316e+06	4698884	269994	383883	3.72335e+06	6.99985e+06	1331978	2939002	1.36416e+06	3.46968e+06	1256973	9649554	6122047	2.72408e+06	3.01983e+06	2.9064e+06	2.30577e+06	4.80303e+06	2.30968e+06	3.10181e+06	1083547	5634309	1.78749e+06	1.80674e+06
P23377	37607.6	30200.8	28286.7	27650	43552.4	24994.1	35027.8	29068.8	50390.1	34251	50362.1	34938	55538.2	77435.5	204059	43646.1	66511.1	34308.4	48413.2	49131.4	48013.4	34040.2	38353.9	74167.7	351849	17927.6	35208.6	45925.5	576518	40613.7
P23680	808709	624876	1.35072e+06	791292	426456	493622	815452	1.0483e+06	1.13817e+06	868013	734118	776485	821002	638993	1.20584e+06	910695	860699	683256	555832	594614	1.50851e+06	746409	1.646e+06	1331966	1.56469e+06	1.22881e+06	358336	1.19288e+06	2.45028e+06	687893
P23764	82880.6	67641.9	95112.4	57471.8	80322.8	95426	362906	275172	330744	262042	334739	271099	397669	361579	347056	336183	243588	244890	71693	87924.8	43215.6	95317	122685	243053	878294	164624	56023.5	225331	407408	117711
P23785	358331	104918	261416	288691	265711	243900	321107	157196	167657	177335	80907.7	157643	210969	258090	267424	166657	153287	172257	57324.3	180838	120466	314771	131672	144488	1.27445e+06	197286	280538	130861	3.06044e+06	357421
P23928	23520.5	10438.9	14905.4	13371	8108.36	14584.3	18292.7	49875.4	20000.3	42129.4	68147.1	27743.4	21502.2	52793.4	36519.6	14923.2	46211.6	87440.5	7762.49	18357.6	15481.1	10959	20528.8	10036.8	170139	9840.87	49826.7	14141.2	329587	25644
P24090	33363622	63769752	62917356	41254656	43098292	26484398	43016704	42761884	48542516	36911180	36291720	36275244	39958504	39129788	33353924	33039604	32381464	20498250	42174212	30495202	71030336	36509020	58486024	31791850	46774404	28741412	44629088	19310638	12300450	22620542
P24268	228853	312831	245226	267116	247601	286218	400266	329539	451343	471786	314984	407755	525052	471629	534256	446024	590680	411609	395249	390128	516285	446621	597371	855405	973536	1.34024e+06	1.52143e+06	877137	814717	1.17401e+06
P24368	69954.5	21439.2	32564.4	58025	83154.8	83679.6	43134.2	63167.8	44626.6	32829	57854.5	68752.1	48929	79784.9	66955.3	68158.2	36575.7	82343.6	222221	77324.7	81021.9	68159.3	49832.3	110422	168440	59180.3	11476.8	65907.2	340700	35749.2
P25031	62633.7	92913.4	156355	87551.2	53006.5	36495.6	64950.6	86029.9	33086.3	52417.4	26046	49561.9	303573	29516.9	58658.6	32331.8	63649.1	6231.75	967606	93956.1	116543	187784	82940.4	187124	48848.2	15253.1	63779.2	4015.83	630363	16054
P25304	16663.4	5998.95	4861.39	13003.3	10130.2	4538.65	6096.07	10738	6886.11	10605.4	1701.13	2115.57	3243.63	4499.28	10737.2	1993.29	3660.73	4728.97	23701.1	4103.43	5031.16	18686.7	35925.3	27807.5	300457	3747.34	20309.1	14535.5	460028	8102.61
P26051	4.18399e+06	6510705	4006824	5.47683e+06	4780847	3.8557e+06	3392327	2.9036e+06	3905376	4852182	2070803	2643397	4293586	3.83174e+06	2.38306e+06	2.55519e+06	2.97857e+06	1.99083e+06	5.41192e+06	5035971	7228535	5148988	4.81023e+06	3.44898e+06	8551335	6.72507e+06	4552020	2.29851e+06	7249847	3.57495e+06
P26453	81761.6	87505	147007	105937	89060.4	77281.1	45103.1	35963.8	24742.3	49037.8	29616.9	28740.3	18763.7	31655	28385.8	38856.2	29560.2	28224.4	70006.8	69441.4	101521	77524.6	51372.8	7619.67	190912	33199.9	39096.6	57991.1	8.22006e+06	60089.6
P26644	1.1435e+06	1.67367e+06	2.06919e+06	1.10596e+06	1.44502e+06	1.19324e+06	1.54096e+06	1.26058e+06	1.46108e+06	1317055	1.18976e+06	1483616	1.74439e+06	1.41396e+06	1.23286e+06	1.11099e+06	1.40471e+06	938148	2.06784e+06	2160469	2.01801e+06	1.57411e+06	2.47252e+06	2.06264e+06	11220169	1.87518e+06	3.39092e+06	2.08204e+06	15160839	3065243
P26772	1752.09	5856.12	5433.57	1697.36	6124.3	9142.63	9248.17	7114.74	5137.52	2775.97	11107.1	8825.54	3998.3	4645.61	13137.8	14873.2	7165.85	5250.4	9160.76	6101.29	1305.91	3423.39	5442.23	13784.8	359191	7604.63	8494.38	15629.5	616945	19903.4
P27139	92947.2	82366.8	36077.4	111048	120890	140091	73909.4	76211.2	88491.8	47623.1	106734	143846	90832.4	124667	202950	160810	52166.1	154957	165758	172762	227279	144531	83101.8	86681.3	3.11755e+07	61393.4	149597	66004.3	8.08121e+06	94300.6
P27274	1.59436e+06	1.82215e+06	1.93918e+06	1.55704e+06	1.4985e+06	1.06191e+06	2665228	1695224	1.75554e+06	2.11582e+06	2.27618e+06	2.29342e+06	4.05714e+06	2.67631e+06	2552510	3.04091e+06	1.80517e+06	1975545	1.51599e+06	1.10154e+06	1332872	1.00092e+06	2.10395e+06	2306934	1.86483e+06	2190043	5.42576e+06	3.21892e+06	3.40236e+06	3.2941e+06
P27590	38215504	38701460	37803252	69516792	49184236	49707512	17546084	42283396	52373672	64461808	33754656	18861044	65512752	44083004	75438352	23918564	85393016	59444128	12530727	25454722	20876176	12573089	59556400	81217528	76651064	120217024	109542400	90022816	312939456	92240024
P27645	65728.5	89172.6	133533	72455.5	77570.1	63743.9	36221.2	25303.8	25237.1	28064.2	17742.4	20897.5	22819.3	21554.6	29878	15479.9	18388.9	20331.9	72705.4	90743.2	95610.4	87242	37430.3	43006.2	189379	62776.5	24736	36459.6	8.16445e+06	48038.7
P28648	74357.1	53448.2	124254	63348.6	71081.5	70050.2	51421.7	16108.5	17855.2	22643.6	20940.7	18473.4	18901.9	33284.4	51302.2	5579.98	36853.5	27784.5	7949.25	15887.6	12204	54375.2	25136	7848.18	302653	24584	26435.6	8381.88	8.35647e+06	23925.3
P28826	1.87875e+06	887422	1.32306e+06	1.45038e+06	833495	1.54903e+06	786895	946012	972554	1193646	887176	1068047	1.14285e+06	1.21522e+06	971171	1.24578e+06	1.04042e+06	1.45432e+06	1.70052e+06	1459930	1.32975e+06	1.05493e+06	1276362	1.12683e+06	369989	772428	2.42804e+06	1.97289e+06	167615	2.02723e+06
P29288	15954.3	1304.13	19647.3	15001.8	28983.2	21354.3	57761.7	36053.1	37811.2	50687.6	28857.6	50958.9	38314.2	36017.6	65714	100795	57531.6	35031.9	32757.2	10501.1	9985.01	36881.9	49569.8	67003.7	210606	110608	101743	48593.9	846414	86410.3
P29534	38272.2	75145.3	349585	168821	41160	95005.6	61087.9	73071.5	262219	197444	80223.4	176518	90173.5	113473	269184	92627.8	264450	174911	224236	23473	163138	32699.9	513553	87077.4	295849	99625.2	614097	60981.3	604893	73652.4
P29598	1.23792e+06	1.08995e+06	1800027	1.1091e+06	816532	1.24951e+06	1.03862e+06	752781	920324	970624	726038	863569	1.02062e+06	807953	809801	776686	1.12433e+06	877629	1.45468e+06	1.81322e+06	2551541	1.90548e+06	938996	1.07734e+06	3.39608e+06	1.43115e+06	198931	1.0694e+06	165112	707979
P29975	163591	55791.6	90970.3	114948	100785	73701.9	312795	362440	236236	473150	699308	380079	214501	482511	145654	185381	244628	293738	146930	236034	165849	153822	287055	104719	691845	238403	1.0269e+06	453682	1.02595e+06	620914
P30120	84621.6	49292.8	116353	83173.4	73077.6	138786	54777.9	16774.3	28628	2686.73	22072.9	44868.9	7154.31	16180	20173.9	25515.5	22858	65676.2	158009	77396.3	98284.4	68767.6	15564.7	61212.1	189379	75138.2	35917.8	59352.8	252563	33529.9
P30121	47602.9	41711.7	93454.2	61150.1	42191.4	54680.5	32500.4	22850.5	11088.6	41995.2	29474.7	32332.7	17238.3	25289.8	24077.6	24830.6	33399.1	27248.9	36505.8	48759.3	77153.3	35111.4	27214.9	63347.3	513423	48890.9	48068.8	38169.4	494840	42041.5
P30152	798400	1.12807e+06	1.28672e+06	1.54078e+06	569379	381314	1370633	991082	1.54379e+06	1.76911e+06	389238	538989	979285	1.27254e+06	1.40872e+06	628490	1.50405e+06	430752	1.23485e+06	414165	1.01307e+06	359984	1264927	824784	5.71125e+06	786050	1.3463e+06	431144	6559939	379541
P30904	131719	24734.8	35749	69641.1	64656.7	97629.9	149750	347920	252957	232772	408263	254954	308994	297434	340733	109231	202048	511789	64835.1	170907	161875	118421	156579	40133.4	1.4833e+06	39124	157663	108981	400100	182628
P31044	432803	352807	176255	299128	337156	287153	222557	224251	250596	182624	248876	208422	191556	313382	351661	297901	229597	271083	361228	488351	791303	432116	283390	384046	1.7151e+06	207040	349376	375968	1.65654e+06	253414
P31211	887646	1.1453e+06	1462155	1.30987e+06	894090	986050	816970	705857	559700	374516	589859	545061	754541	584450	405662	570756	597002	505362	1.65068e+06	1.1808e+06	1.22382e+06	1.21111e+06	733618	476051	1.0754e+06	932983	353264	332451	1.06995e+06	404489
P31977	122714	43008.5	39980.1	66775.7	91312.4	201950	70482.4	119134	32428.2	65365.2	131794	114179	25986.5	144131	38585	80205.5	43992.6	257181	270062	126690	171796	119715	68768	114964	272977	106712	182793	136345	221870	110947
P32038	536467	1.28789e+06	1.11513e+06	930449	962433	413184	837102	1.31036e+06	717201	709021	836389	486425	927037	1.26843e+06	508914	1.06681e+06	465239	540403	423868	397520	343173	363697	588791	393860	943167	544898	434484	232205	903696	301064
P32736	51467.5	53614.3	111223	82709.8	76546.4	56163.7	1681.87	3227.93	36645.5	39214.7	28337.2	270.786	41762.2	60298.1	43160.4	32245.1	43776.2	35894.5	50954.2	58040.5	117115	58023	69610	53019.1	264141	81951.5	57333.5	47624.3	711468	42615.6
P33436	10350.9	5589.14	21669.3	14491.8	12531.7	9859.61	3342.16	4711.6	5734	12224.9	11353.1	6335.19	6714.79	18017.6	4750.92	1410.14	6888.43	7032.56	3994.91	6894.98	11423.7	5725.53	4740.34	12997	327602	11777.5	7923.92	2524.86	616945	5010.79
P34058	17897.7	23107.4	10490.9	9830.69	12711.3	24908.6	7975.55	16740.1	14608.3	16023.9	23463.2	42003.7	12587.2	9711.46	24155.8	13499.8	17754	23664	82202.2	22999.6	53147.3	33228.7	31682.7	10306.3	291215	17757.2	28306.8	21804.2	515563	15726.2
P34080	3176.13	3261.42	7427.21	6499.89	8403.46	4377.57	12703.9	10574.7	11890.9	15692.1	8264.42	6923.77	7960.96	12981.8	17071.4	6563.68	9261.43	4644.4	7527.81	14724.4	22525.1	12940.3	7753.72	34026.1	359191	10179.7	51731.9	79462.7	616945	58405.8
P34900	110310	248178	253182	202567	198664	201317	79069.2	84655.8	61412.5	84481.7	77443.2	107054	64213.5	63481.7	47199	60642.2	82524.4	63887.8	133726	190051	148027	233558	92449.2	150983	415339	12517	95764.4	53816.7	468303	71298.3
P34901	95988.6	126790	211476	685.477	136590	172071	63238.3	81197.2	57284.9	60317.4	61097.4	84172	163756	350988	82157.3	61575	126948	57170.2	11799.5	179777	64920.6	254772	46256.2	185938	3.11218e+07	110210	64880.2	57759	7.89198e+06	1880.47
P35434	22866.4	46401.3	25073.8	20123.4	28351.2	14388.8	10460.6	19531.1	11817.1	6621.53	27412.4	24945.8	16366	24672.7	11955.6	22252.9	10405.1	16675	34051.1	21815.6	20000.2	27064.5	14011.6	14986.4	291215	16346.1	10379	18774	654027	8160.65
P35444	78872.6	153939	168265	83722.3	135319	61396.9	57272.8	58846.2	28443.8	33005.3	37468.6	33217.2	27331.3	59900.1	32319.7	44183.6	22718.8	20153	95579.3	49308.2	116814	73126.8	75557.9	33800.1	119837	56985.3	98483.1	33230.1	8.13624e+06	35958
P35704	48097.8	59199.8	41533.7	30773.9	62338.8	52667.7	28089.4	53727.6	60002.6	43218.2	54678.3	58094.9	44071.3	104750	92418.5	63713.4	49920	61120.4	96391.5	79629.4	77424.3	84832.9	68880.5	92668.5	264360	79322.5	75830.4	88871	421187	75753.8
P35745	10936.2	10507.3	21011.6	24121.6	19940.2	9896.52	22284.7	30458.7	29845.3	25392.8	31650.3	21242.9	46801.1	29726.2	34547.9	33914.1	32226.1	22891.8	20985.5	20400.6	14190	2886.64	44073.3	41807.3	257801	15395.5	58897.7	24731.1	616945	31764.6
P35859	35691.2	72493.4	77060.2	29081.9	52179	26241.2	17600.4	48317	60455.1	3939.13	52819.7	62249	66444.7	17858.5	51013.1	62079.3	66050.1	57704.6	79623.4	46063.7	87688	25358.8	56036.1	117539	203348	88659.1	98838.1	59434.4	343435	66272.9
P36373	13126700	15924608	21294338	18000828	16948246	19016296	9639394	10611096	8981226	10363774	8787006	12666869	11861342	11944333	9813398	11666814	12246902	17038626	14307103	13151304	19907200	13675609	15872863	19748730	13258662	21107344	9121949	15841916	9546052	13424668
P36374	49646.4	10222.3	5305.61	8983.44	33217.6	57890.1	136001	126719	15009.9	8844.68	176817	264085	66220.5	303688	123371	412770	99330.3	827895	39047.8	18550.7	18975.8	22395.2	227162	251806	988865	263798	160798	352911	560621	341188
P36375	1.89499e+06	1.54499e+06	3.18618e+06	710603	550462	2.88614e+06	1.75538e+06	1.18577e+06	1.76561e+06	1.77452e+06	1081793	1.52461e+06	2.48986e+06	1.05413e+06	1.60417e+06	927868	1.74857e+06	1.39825e+06	1.27558e+06	1745961	1.21002e+06	1.10782e+06	923542	1.63469e+06	1.79674e+06	877684	529624	917550	590111	1.28785e+06
P36376	4710451	2342614	3.94039e+06	9650795	4591006	6755023	2.8836e+06	1.35041e+06	606621	1.72556e+06	929949	447434	851116	847876	1.12375e+06	887184	241515	188742	3.17874e+06	4250589	6177666	389558	1.51539e+06	2.76558e+06	3.63486e+06	2.68236e+06	484630	1.44289e+06	5.02151e+06	746283
P36953	168872	152814	235894	176017	264197	129414	317008	293033	438118	301880	390808	297610	411922	269736	423875	464261	322846	254842	286662	241982	180246	211294	412888	377527	874936	451393	409744	335934	166426	437843
P38438	289565	469119	440143	412483	388646	350914	281481	253214	229951	241864	210773	218958	287839	198640	256251	275509	263012	192567	302308	382474	530462	336217	329670	328146	2.27311e+06	346142	465574	252880	587372	233214
P38659	29992.3	38982	69961.3	49859.2	34820.7	46366.7	19370.9	11938.3	18068.7	23181.4	13358.2	21684.9	5201.38	18340.9	20709.9	17892.3	15145.3	4359.25	22237.6	23360.8	44099.6	32168	28866.8	33174	377245	22794.7	18175	38727.9	394026	17133.8
P41562	10931.1	15566	903.452	6880.95	21660.2	4372.46	12589.9	27874.3	39348.5	10100.2	47588.4	25644.6	14931	43721.6	62500	52786.3	15535.6	36515.4	19813.4	19038.8	26050.2	30321.6	32802	55455.3	291215	30119	32406.8	46248.7	351504	42011.5
P42123	124294	130727	76893.2	129744	165861	114184	130468	124264	164987	116564	179038	112610	98526.9	202585	253968	220900	115401	101959	195165	231159	346777	302236	194758	175994	3.12341e+07	181237	103724	170697	7.69158e+06	189361
P42854	3177597	5.65228e+06	1575087	3489422	2213343	853644	6.44047e+06	10361383	10451829	8446426	8059752	12609445	8.07378e+06	14078620	11370870	10689478	8889226	9900026	10408830	1.25087e+06	2.32411e+06	2209655	14692085	7154893	3958998	1.4371e+06	8449060	2.01313e+06	2.35552e+06	2.1039e+06
P43303	132348	230891	235215	207520	156116	132651	231238	232601	318370	308414	242563	272616	316384	345494	348776	319451	476703	340530	131411	104147	173386	142273	386101	510595	765850	594364	847527	478740	2.43785e+06	530005
P43427	35577.6	68949.7	29840.7	17419.3	63405.5	16992.6	46574.7	18603.5	38757.6	50739.2	56131.6	46075.1	21398.2	10212.9	8990.71	12082.8	9083.68	63764.9	47874.3	58103.5	10018	13689.4	34653.2	30441.6	377245	11184.2	99293.2	20456.9	8.52689e+06	27719.7
P46413	31073.3	27947.9	35788.5	21584.6	12846.7	18652.8	23424.6	30348.8	32170.2	19464.6	70816.7	18458.3	24667.9	56042.4	30733.8	40861	17757.4	46099.9	52768.3	26539.9	41484.9	51416.3	40195.9	59088.6	377245	47628.9	50083.2	34745.3	290749	61117.5
P46462	18197.6	22120.7	23269.6	7212.48	15846.6	44065.1	23011.6	29354.5	27825.5	25981.2	25086.6	36171.5	22738.7	50829	24539.6	36754.1	28366.7	44196.8	34808.3	18956.3	21752	19280.1	54062.2	56253	257801	19086.2	44706.6	58671.3	380838	37321.3
P46720	15215.1	10821.6	13878.8	13561.1	9720.39	12371.5	9427.85	9963.46	9989.32	20401.4	34129.1	17453.7	4545.63	9317.6	2415.82	7797.58	3267.47	15759.2	25640	11768.3	14468.7	9462.57	8440.2	10799	314759	5810.22	40378.5	13873.5	683361	23837
P46953	12660.6	18434.9	20683	10687	5320.29	6925	33139.4	61251.3	56395.1	48158.7	110753	60270.5	40162	25034.7	57862.9	86697.2	42972.9	87235.5	15220	9315.23	19191.1	22637.6	50238.3	36585.6	248826	37074.8	90891.8	45252.3	448355	66975.9
P47820	142741	127149	83552.4	129670	76807.8	177254	92172.5	59944.9	71347	90978.6	50651.5	119392	135527	87025.8	121957	68104.8	184656	134889	174520	161842	237754	191299	142989	217221	530519	173919	90054.7	207468	91865.9	179727
P47853	106304	66476.6	62370.2	15698.5	163121	48847.7	40718.2	91289.4	184059	12704.3	66172.9	33305.9	44676.5	148787	172842	85488.4	63099.8	43551.8	60103.8	60280.7	57282.1	84184	30582.2	83273	199801	206361	9277.78	20608.3	166307	23024.1
P47967	267665	552996	578051	239464	250193	216100	254067	273341	320670	170136	241296	269831	333253	564408	374521	226960	533406	256924	309384	505868	399406	326157	1907.65	341740	1.49059e+06	266832	598493	166285	662493	96120.7
P48037	21150.1	37171.8	20578.9	20571.1	23046.5	24203.2	18479.9	24934.7	12512.1	13255.5	20149.1	17633.3	20134.7	33214.9	13011.1	9837.74	5936.46	19947.5	26668.4	24192.8	41233	14507.4	19573.8	13258.8	257801	30422.1	33330.6	51226.5	672165	28779.7
P48199	780529	1.11346e+06	513630	1.02444e+06	1.08329e+06	1.03724e+06	1.33291e+06	906924	837345	1.03774e+06	863550	855225	1.25179e+06	875433	974999	1.64211e+06	1058953	716633	307758	759626	489433	600531	1.14058e+06	416746	8481413	1.53759e+06	805617	1.43092e+06	7.55829e+06	1.59591e+06
P48284	21530.4	29459.8	19965.8	18179.9	16223.4	18240.6	15849.4	14690.7	16437.4	13669.2	16762.6	15620.1	15856.1	18702.6	14083	10863.3	17800.3	23303.5	37865.4	12608.1	17355	25166.1	12534.3	26498.4	327602	22165.5	21685	20874.4	654027	6589.74
P48500	32419.7	67852	53096	66747.1	64836.1	34770.8	57172.5	59602.1	64355.3	40879	76526.4	53644.5	40267.1	114209	83529.4	72040.5	43734.2	63197.3	88611.7	76244.4	113804	98115.8	67059.6	72698.1	372888	84128.6	55648.2	91205.9	688448	69338.2
P49134	52287.8	54049.9	78408.5	75129.1	39529.6	49437.9	35041.9	16071.9	29076.3	23192.4	6720.73	19430.7	39435.9	13426.5	54022.1	10487.7	17032.9	28328.5	17046.2	25281	33631.2	41038.9	16102.4	13883	377245	9998.58	23354.7	18065.9	8.34461e+06	11694.2
P50115	24871.1	14331.1	12312.3	23692.8	5475.66	11583	56760.5	11458.6	76582.8	113149	15016.8	30442	59246.1	39572.1	26020	117614	52738.8	26052.3	42105	48222.6	50047.4	17590.5	11771.6	15583.4	265037	17702.8	19155	17215.8	896791	63327
P50116	17999.1	2454.53	4093.34	8226.84	4654.79	14801	68252.8	6450.54	81015.5	170905	7319.18	27318.8	7768.37	32492.2	16919.7	72686.4	43455.2	20729	54473.6	27370.9	24263.8	13777.7	22661.2	21958.1	219754	9210.05	14458.1	23273.7	1257866	76344.7
P50123	550559	564368	649066	705990	472720	493974	662139	721888	893170	920297	867777	777928	800630	704045	681885	907398	836539	831191	566904	482526	636656	586106	702330	660962	1.28077e+06	522814	782669	767912	1.01049e+06	563259
P50137	15610.5	12094.4	24140.3	12365.6	13869.1	14374.1	15618.6	1830.26	12011.2	12228.6	6546.13	10114.1	15765.4	12520.2	5797.76	7278.18	6825.36	6747.1	67744.1	12271.5	32974	23807.8	10481.2	5446.78	359191	7493.64	11836.1	17984.1	616945	16290.8
P50399	22221.5	11078.3	15643.9	10727	32493.2	36036.8	28154.8	39297.8	50464.8	24734.8	51715.7	42383.1	19394.9	18076	35354.9	20516.9	16028.3	56629.1	62690.8	37783.8	47161.5	40911.7	35664.1	59038.4	377245	41518.2	31310.5	24238.5	319606	25954.6
P50430	176098	211599	177902	203756	178224	195174	211044	274595	317519	264578	274481	235815	306754	181078	342862	421507	309375	229536	91221.3	116712	127113	148721	342484	365948	141338	315874	450917	328297	396403	276763
P51635	17481.8	16202.4	10361.7	19402	27448.7	14663.4	22484.9	80575.8	97743.4	25799.7	119030	50638	25577	127073	139528	146684	60701.2	102249	25880.2	31747.7	26874.5	53871.2	59695.4	50884.1	213845	51287.3	77028.5	26043.3	229526	29826.7
P51647	38364.2	40313.5	8689.29	25602.3	42110.8	35288.5	22469.4	20865.8	13125.1	14038.9	19695.4	7101.89	22873	15388	8342.08	9910.06	12368.9	14600.7	49351.6	62091.8	62027	62555.6	19186.9	16438.6	291215	36989.4	17588.2	40071.5	566332	63774.8
P52590	3878.67	1.30935e+06	14309.2	502373	5820.46	9924.06	1.2194e+06	4367634	4.42268e+06	1.72387e+06	4391714	3.14625e+06	4907803	4316136	6381836	5586823	4.13923e+06	3.63113e+06	3244.43	37846.5	24426.9	420717	4039595	8964222	2.81498e+06	2.15544e+06	11207727	5.48166e+06	3.32298e+06	2.55806e+06
P52759	83790.3	62288	117637	71457.7	46950.3	56246.8	108764	350893	305819	306337	490671	241635	282240	402579	574455	651520	380838	444148	144277	100382	124229	144905	200393	234289	118495	172489	1124220	516884	835661	621449
P52796	27900.1	43076.6	48977.1	26193.5	26290	17869.2	32274.5	41419.5	48031.5	20322.5	36319.8	27614.4	59945.4	148656	57335.6	47562.8	48373.6	41483.6	41615.7	21842.2	60696.5	24660.8	105396	121817	337015	49063.2	185307	73263.3	1.2433e+06	33458.7
P53369	79927.4	78177.6	140832	99848.3	102267	98959.7	53480	47362.7	32612.4	45902.5	22676.5	25228.9	37280.5	36849.3	32182	25716.4	40096.3	34466.7	39158	106523	185441	142716	96535.7	110185	119837	101859	9747.54	70630.3	389330	30486.1
P53813	45718.9	32543.6	26662.2	32454.3	47593.6	55306.9	27248.6	27980.3	74618.2	26561.5	29646.6	17464.4	32805	38891.9	66462.7	64250.8	36623.5	31977.1	53965.5	56663.9	122603	85367.5	69310.6	81303	265703	65485.2	81458.9	80544.1	341880	84612.2
P54759	1.37886e+06	510115	1.73683e+06	957122	760370	855100	1.09275e+06	559952	435541	552632	545207	499097	477906	432210	582613	475396	590319	461969	1.23565e+06	1.26935e+06	1700858	1.55159e+06	1.17841e+06	1.27948e+06	1.39327e+06	889607	227591	1.07174e+06	1.03413e+06	1.05283e+06
P55016	6752.71	8895.17	8919.21	3069.42	7366.3	9748.75	6381.25	3458.28	4186.58	5238.86	14686.3	3300.47	5632	9869.67	6985.09	2547.48	5580.41	8205.18	4459.17	13565.1	7582.62	10807.7	6889.18	10995.1	359191	3453.19	10593.4	1636.48	616945	12252.8
P55091	8540.14	21177.5	91223.7	11563.4	10359.1	8527.66	15696.1	9691.78	57434.5	2412.77	18952.6	6505.04	101542	33483.8	15086.8	5533.51	9980.36	14821.8	53257.1	19362.6	11656.8	13937.6	12109.6	449632	335725	18681.4	32304.1	82251.1	285859	3674.18
P55146	56351.9	37168.5	86588.6	68921.2	52026.8	43493.2	44859	28642.5	37632.2	39029.4	31666.9	34261.9	39108.6	36645.5	61596.4	29227.4	37705.8	37355.5	33788.5	45306.2	75482.3	39920	47889.4	63922.5	286579	93303.3	55981.4	60872.2	209930	40898.8
P55280	17406.8	19630.8	99101	28046.7	35908.3	3473.29	16206.1	53589	30977.8	10230.5	43362.3	18090.5	14317.5	41439.9	168016	15860.2	14416.7	26650.4	21040.5	53610	40061.5	65204.4	40469.9	31506.5	342430	60118.4	36591.8	92053.1	8.3334e+06	59328.2
P55281	7556.83	54262.1	45506	18387.8	37577.7	15734.4	14072.8	24754.2	24932.9	13777.3	18374.3	9774.61	24735.1	12891.2	25952.4	17954.3	20632.7	13783	78618.6	17857.3	11807.6	20921.4	34436.5	7691.93	257801	27753.5	14345.2	29735.7	672165	12973.3
P60711	549985	719484	282322	452271	565693	539331	675522	736600	682285	1068509	1.34863e+06	909053	549329	1.11242e+06	698430	865163	598899	1.14987e+06	1.50155e+06	835307	1.21277e+06	938516	706081	721344	820790	605236	1.19105e+06	581834	484223	778092
P61206;P84079;P84082	18093.8	19907.3	49506.9	7246.22	39146.5	19626.7	19062.8	23743.5	19001.4	36532.3	45486.5	39313.5	16162.4	26610.7	12866	21775.6	25203.6	47000.8	55947.4	27321.8	35262.9	25194.7	29554.7	21767.5	257801	28182.2	23743.1	25746.3	344395	24181.8
P61589	25000	15445.9	11201.6	17988.3	15557.2	42176.1	22050.2	47632.5	26772.7	29915.8	47766.2	42562.4	12393.6	39472.9	17684.6	19665.5	16927.4	76435.7	42168	24343.6	37711.7	29585.3	30687.4	46132.3	377245	33271.1	69139.6	36771.5	351504	26725.6
P61972	1.04706e+06	292051	514327	661357	821877	822757	478650	389233	542886	466736	266634	395555	534575	584262	567551	311289	505035	562756	564044	867138	546829	690846	1.00761e+06	1059864	557532	453479	452452	784111	275549	657382
P62260	44076.5	42175.9	65829.8	48056.1	40500.7	57277.6	13442.7	30624.8	17794.2	17197.4	35418.5	26835.2	10015.6	35731	28620.8	30625.5	15547.4	51423.9	84104.8	62660.3	90994	53900	21168	54935.3	309239	60726.8	43787.3	47616.2	8.16088e+06	38947.4
P62804	210658	86791.1	116209	66046.2	134331	88560.9	102351	32440.7	58199.9	161995	80059.8	75341.9	61911	136330	38835.4	103127	77484.6	49500.3	333077	83170.9	125283	42383.3	9651.42	104169	426052	21201.8	30804.2	110437	606472	20322.8
P62898	33513.4	104759	126763	29921.3	47468.3	34228.8	35737.3	29467.3	36472.6	18100.8	51816.3	41539.7	25925.9	20648.9	44683	67717.3	35928.9	35972.5	85084.8	38159.4	48104.2	30224.1	22610.7	45942.4	266235	87476.1	20475.1	83363.9	8.20557e+06	104557
P62963	59985.3	22335.4	13195.7	29900.2	54685	38836.1	42910.4	21629.6	25022.8	55536.7	46563.9	38866.7	21805.1	18161.3	29944.3	50489.2	18068.5	48704.1	83381.9	47040.8	110239	50639.6	17140	34133	299361	18549.9	152048	33869.7	614060	31290.2
P63018	177106	196106	78209.3	163642	173150	196358	114567	177146	125785	133604	232484	190167	79900.4	165248	134172	187856	84257.6	273184	147024	162358	298156	186240	132154	146574	429083	170839	111999	161138	86211.6	185987
P63102	21996.8	17043.7	33055.4	32213.1	34373.1	44831.5	10832.1	14526	14778.5	15249.6	21114.5	12456.5	10080.8	14315.7	20383.3	17967.9	9909.11	13275.5	44449.6	29462.6	26240.8	32572.8	31163.1	17124.4	327602	26937.7	22967.5	24246.9	654027	14877.4
P63322	26004.1	18953	16391.4	12297.5	12168.5	14266.3	5647.98	19152.4	7263.69	11048.6	14539.6	13640.3	7835.13	20297.8	7063.36	3989.67	6593.89	22706.5	9731.28	8004.65	11881.3	11952.5	7677.7	10872.6	359191	5297.33	20264.2	14170.8	616945	8245.91
P68035;P68136	68246.6	143522	21795.8	46967.8	51003.7	35534.8	52610.5	26817.6	43742.4	44302.1	139180	79544.2	62498.9	154345	56561.2	110538	29340.4	90764.1	55343.9	52404.9	27168.2	60046.9	38440.2	36667.2	3.74807e+06	62065.5	153558	94023.2	991117	106167
P68255	82497.1	76157	70723.6	90160	107849	101692	54749.9	53131.3	57681.6	51752.4	70704.8	49255.7	61642.1	63122.5	70974.7	40998.7	54311.8	80087.2	101166	114266	69838.9	87616.4	51047.4	39612.1	173095	81334.1	46568.8	62774.7	332471	49391.1
P68370;Q6P9V9	51763.9	43270.8	28485.7	21992.4	60207.3	45028.3	27569.3	33258.7	38129.7	45767	61903.6	43882.4	20132.7	41099.9	42476.5	31625.8	14780.6	52319.5	53994.6	41475	61397.9	47958.2	40148.1	34447.4	377245	33129.1	32933.5	22832	384179	31784.2
P69897;P85108;Q3KRE8;Q4QRB4;Q6P9T8	17535.1	8066.36	11327.8	7991.21	19899.5	14262.7	14598.1	18097.5	17376.8	19973.3	38490.1	17922.3	14594.3	29038.6	17249.2	24529.1	13191	29124.8	30490.9	21814.8	36784.6	15573.2	19610.9	30111.2	327602	25974.6	16409.3	19595.2	616945	11321.9
P70490	146639	260163	483154	214856	165634	195000	135016	117445	123862	132367	115568	100599	151970	126870	157682	140291	115812	109532	148029	225994	266257	422301	150045	190854	190876	248458	133216	113208	309420	135626
P70709	111075	141982	202225	146025	81620.1	133362	158451	74336.3	81638	105999	43389.9	60530.4	122671	115257	57809.3	32258	124551	136246	96833.4	197877	218883	177018	63041.2	156419	3.12783e+07	187602	64048.3	138872	439615	168812
P80067	596506	551273	396082	581537	464159	532398	687512	646129	755761	753005	564578	606938	975550	340251	835251	876705	921496	639294	497909	496201	775742	562922	765283	648645	609879	892468	569902	889840	934893	812903
P80201	79107.2	56773.7	106441	93820.2	83982	63995.8	67579.2	83545.3	73119.1	87977.3	39535.4	38549.4	74297	66893	77847.1	72179.5	25358.1	71123.4	67361.1	80587.3	80864.8	100405	64096.9	71814.1	361679	43822.7	93977	52031.6	754818	55590.7
P80254	79047.5	51198.6	87091	71637	74389.5	22922.2	25418.3	71510.5	46335.3	17656.9	65083.2	43259	59259.4	130002	71349.1	80188	33128.4	65955.5	49244.3	50711.3	67051.6	60451.8	38233.7	35596.1	391839	52369.2	31169.1	59505.8	9.02119e+06	58766.6
P81556	11679.4	7210.73	22507	15397.6	17233.5	16668.2	17990.1	10430.7	11357.5	11038.5	20855.5	13406.3	13011.8	5349.54	10748.7	8782.6	5605.9	21905.7	35659	14580.1	9721.8	14354.1	10815.4	29228.8	267043	8640.71	22512.4	16865.5	460344	17166.3
P81827	1.44662e+06	862063	1.35062e+06	393888	2.64958e+06	1.65775e+06	99907912	96660856	130429304	131954672	103483712	123421632	185323104	188611232	167246784	85081880	92592104	131197408	1694794	1.77478e+06	582580	1.62264e+06	109669288	55710384	686842880	99128192	286297760	242216752	1589932032	176576512
P82450	184053	306771	211645	288893	258956	219304	228451	188445	218136	227936	176612	190703	271025	249146	204895	233069	262796	154686	133971	126482	180488	162690	314497	343261	352074	257070	314940	174978	866257	145903
P83121	1.66752e+06	1.07011e+06	1.72384e+06	291479	3.9094e+06	2.08686e+06	14861147	85693576	118394016	101958440	99011960	111024064	125841448	77691472	105954640	111110128	63306912	106393632	2.32507e+06	728624	233508	1.01243e+06	62896176	54384080	570180352	57987356	141503888	113933568	607983360	76890072
P84039	33563.1	14342.8	34736.8	25933.5	55654	18573.4	120030	89378.4	202955	155311	135943	113844	182859	41688.7	220368	180151	219267	102700	3940.04	16427.5	6293.12	11394.3	37536.7	41734	3.61675e+06	54652.6	29008.3	99657.3	511155	43348.2
P85971	618363	204294	158682	435920	723500	436714	582126	655552	657612	411023	483818	483828	454367	718543	450952	478100	484769	538569	776989	1.20744e+06	709965	827020	947544	736787	2.43412e+06	479744	377951	364393	2.98283e+06	400191
P97546	624655	553543	1.34346e+06	952123	742527	510478	288194	204189	248982	244138	187458	313366	208544	79780.9	232016	145050	211684	173477	792907	523664	824829	612177	353183	289902	1.07287e+06	341391	320220	198680	753848	183463
P97553	66367.9	90357.9	29913.3	75904.4	72904	62929.3	50229.1	43149.7	38567.9	40113.2	59129.6	46078.7	87553.4	62976	91088.3	77734.7	45118.9	85425.9	75950.6	74568.4	54658.7	73379.9	115100	23094.7	347990	68216.5	71546.8	56557.8	1.04028e+06	75361.3
P97574	116012	74899.5	185828	153035	115552	133755	179979	117807	118258	126725	117223	81452.9	67171.9	78932.4	103472	120987	66890.9	42441.2	88186.5	60204.6	123193	111397	195626	189222	1.77923e+06	300124	702130	384572	2.04384e+06	553256
P97580	62395.4	97093.5	193166	97596.3	178803	19632.9	546419	210458	346.884	38454.4	209613	279245	66980.8	2.00024e+06	344263	1.07053e+06	953477	55731.6	371389	118433	129441	180269	1.52671e+06	1.63597e+06	4.19666e+06	444834	1.68885e+06	300054	217783	532868
P97603	136114	193768	264530	208889	169991	137308	95286.7	77988.4	82670.9	112050	76110.8	76598.9	113993	66490.1	71369.1	79021.8	89826.6	71698.3	152699	165365	156137	188233	115645	109371	450608	140823	130049	60765.8	666450	81597.2
P97675	54365.4	117687	141554	53299.8	22066.3	55654.4	60038.6	64659	64719.2	64684.4	113742	67631.8	30833.9	104215	91695	88312.7	86029.1	63563.2	119449	43802.4	87831.2	59134.5	37486.8	100115	411968	96546.2	143454	131451	520651	104919
P97710	148841	213771	274328	229058	155731	137902	127612	122789	137688	142718	166395	138740	193534	155465	206327	142693	172566	114899	156758	107333	190624	150748	176220	196561	594458	174560	235544	138536	407845	152521
P97829	145652	137422	292371	201145	203561	190938	152719	129832	139590	136701	138720	130466	191532	141851	130140	146420	151327	145364	186838	188344	176593	173987	199684	272679	370815	174271	297836	67559.6	19450.8	151067
P97840	117252	408733	497225	143964	138079	111289	142440	239601	283688	118070	212233	217214	204939	292608	469988	195801	329637	194252	377664	220586	366575	193282	16156.7	276900	1.65081e+06	165493	123959	55097.2	485165	43980.2
P98105	6698.61	10222.7	23935.1	17916.4	9287.21	7412.17	9565.66	7626.75	8456.44	12415.4	7717.67	15660	10845.3	15615.6	10792.1	9982.79	16929.5	15198.3	12626.6	7671.15	11919.9	12570.2	10068.6	10008	315266	27654.6	16121.4	9673.48	94301.3	7271.25
P98158	1.52571e+06	1.49062e+06	2.57029e+06	1.5562e+06	1.52421e+06	1.42378e+06	1.00372e+06	994194	1.2237e+06	1.168e+06	956167	1.10928e+06	1.22464e+06	1.1592e+06	1.39444e+06	1.22377e+06	1.47765e+06	1.0753e+06	1.14366e+06	1.58437e+06	2.17646e+06	2.37698e+06	1.66171e+06	1.98959e+06	5.65106e+06	2.22378e+06	1.72965e+06	1.52931e+06	9256532	1.62182e+06
P98166	257763	243981	301028	275034	457031	620080	57627.5	155458	272086	259787	251251	426523	320610	141746	82170.8	125002	271893	693238	639060	326682	603262	197290	180225	643228	644948	443840	294238	643474	412043	383262
Q00238	160942	265365	337649	219353	209694	153568	151777	232519	239442	105312	145543	173557	172275	238024	235024	192220	223413	164522	307268	275119	386309	388007	343981	322352	2.83846e+06	381133	367001	179060	5624739	163833
Q00657	177554	179898	184323	162013	184313	131993	117412	100051	111950	56378.1	79904.9	95040.9	109864	103430	92838.8	99052.4	137759	78325	452255	738186	804872	895665	337083	356457	286195	493151	300915	224454	296364	166723
Q01177	1.15742e+06	1.29678e+06	2013601	1.67135e+06	1.65973e+06	1.0098e+06	756082	626277	637301	635633	743972	710818	743530	847661	607109	785241	914729	609200	748014	992258	1.62778e+06	794819	917344	1.11818e+06	1.67512e+06	348848	1.3039e+06	910773	512553	934681
Q01205	847958	156947	955848	963867	587050	880591	614355	285125	586088	1.1574e+06	183000	307313	867448	558393	578779	538661	586940	276153	761242	960316	1.1412e+06	1447308	553876	20173.3	1.00757e+06	442034	792934	473698	1.41503e+06	484110
Q01460	276334	344927	434911	370418	211500	285910	340894	343210	319000	363048	340899	381216	447132	432894	399147	481531	461766	372787	210061	139557	300941	229458	444891	586486	1.36556e+06	471859	714242	365858	1.3321e+06	395610
Q02765	191312	378085	156156	119973	221251	78656.5	292875	186491	225897	167456	243052	179264	398866	377952	324664	314508	187394	195159	152359	84523.8	87623.2	85771.4	277241	156367	909658	182527	236078	145682	749701	156400
Q02974	14078.1	13623.1	18405.3	14687.7	4367.05	10334.8	26062.8	41181.3	40278.8	17182.6	46477.2	27656.4	12461.9	43395.2	36978.8	50996.6	37209.5	52430.9	29737.9	14397.1	13301.3	24450.3	27880.9	26027.9	315266	30415	51059.9	42558.3	162762	46016.9
Q03626	509914	625736	627727	295717	496714	498232	360936	260042	350217	184260	269318	220300	350487	248234	198016	273471	190279	206499	326927	368260	558600	325228	290469	531345	163716	345472	326778	385664	140043	609031
Q05030	51196.2	67343.4	72315.3	62835.7	53438.7	41670.6	35103	34090.2	25398	43539.6	14714.5	31760.8	30099.8	26578.9	25718.8	32245.1	45935.6	16053.2	45339.4	49254	36068.8	58602.9	26627.8	33248.4	377245	27138.9	25840.2	22022.8	8.34461e+06	29836.2
Q05175	20493	5198.47	13299.8	17495	6704.91	16088.3	27166.3	35058.1	45672.8	76181.4	45314.1	39712.2	57696.6	57954.4	47424.6	24811.6	73316.6	138212	9298.73	13142	20927	2273.73	33688.2	57088	155421	32157.7	308406	66925.8	976304	78030.5
Q05695	59930.9	64555	36520.2	56886.9	59250.8	58003.9	52852.3	42480.4	41227	41604.1	31794.5	35162.9	58897.1	49138.1	38234.8	36617.4	59693.9	46105.8	46017.5	44810.2	90943.2	79587.1	48111.1	80336.9	203348	75626.6	88416.3	90664.4	211933	76898.7
Q05820	109437	50298.1	147933	281634	301549	219120	142695	153078	160255	179493	216667	142056	158284	197925	124269	215225	263183	104161	519583	266004	251710	183736	381059	315559	202082	254713	174557	186932	193602	236628
Q06496	117351	57815	40013	15572.5	49802.9	59490.4	29739.2	32053.2	11828.8	39146.2	55460.5	53531.2	39495.4	19140.6	34442.5	17752.1	15838.8	37704.2	128435	83286.5	168979	125781	39185	25907.4	207795	14717.3	32410.5	12773.5	8.15417e+06	16680
Q06880	76088.9	52332.5	125800	94537.8	99626.9	95837.7	78917.4	53786.8	44765	71408.2	31938.4	50179.6	50357.4	54795.6	56897.6	160831	80051.5	44402.2	129406	115944	67166	121333	123343	93491.5	4.29509e+06	279573	289427	199752	389300	295040
Q07936	12455.3	8247.04	4973.75	9546.74	11176	12989.1	13544.1	7223.82	23439.7	32996.7	14366	26801.1	14518.3	21865.5	8894.1	15215.2	17741.3	9981.59	32528.1	7715.42	7940.24	10015.5	12689.3	9988.16	359191	34032.8	23915.3	29481.5	616945	44642.1
Q08406	30902.7	46696.9	43837.4	35109.4	22690	26166.7	29587.7	27614.6	28797.2	27258.4	29692.1	23211.3	78328.7	17095.5	27910	38367.5	39163.8	28087.2	23604.2	18210.7	29196.2	24125.4	28238.9	53588.4	377245	28924.8	27585.2	28125.2	390762	25302.2
Q08420	265889	256778	391638	293785	181350	155358	261393	248618	274496	184793	157288	206684	237123	244485	245358	176085	227446	133596	159405	179051	198384	217136	165950	154471	1.36697e+06	235309	34231.1	122269	388997	94383.4
Q08463	406561	403073	533781	478822	358417	409025	476662	226995	285714	364141	171734	338434	396742	263990	287434	199341	344815	245414	255552	346193	254494	463641	365459	249721	2.1089e+06	221939	175223	159536	686865	282212
Q08464	81671.5	111359	157630	126612	96309	97751	92382.9	77872.7	70531.3	81934.6	46077.1	60630.5	84505.4	109744	68160.7	79872.9	77573.6	48292.9	85729.8	78089.7	198669	74457.5	116366	100812	318161	119295	156110	86049.4	863951	115680
Q09030	567365	428995	1454483	1.0164e+06	414422	897614	479705	192637	321107	1.02265e+06	80529.2	285014	490429	293081	510494	301770	174108	256731	377587	505807	1000599	718556	414236	389799	233851	245778	3.37004e+06	1.34848e+06	2.20546e+06	1.1196e+06
Q0PMD2	715800	1.07992e+06	1323918	817753	646826	674945	550142	499310	500619	510624	435904	447750	507736	543689	480508	466535	452408	368855	871884	876220	1.15257e+06	997473	955155	989446	3.85736e+06	1.30429e+06	821294	629653	7.24922e+06	545412
Q10758	31749.9	63575.5	27006.9	43192	39155.1	26616.8	156610	112101	100171	103269	123443	82645.6	116215	399125	122632	106216	107296	110172	194168	69066.4	29002.2	54124.1	76753.3	91306.7	959572	69231.4	140227	103010	558269	104877
Q1WIM1	192434	235109	300150	243091	152649	155247	63484.1	83321.5	80161.6	75856.7	52780.1	61452.3	94874.7	88564.1	56365	61740.8	45140.5	49350.4	159669	161616	311793	240039	112506	118543	455541	109695	127861	63632.6	515422	73687.7
Q30KJ2	25219.7	30584.2	10544.8	58170.9	31268.2	40622.8	276539	153836	30273.7	11794.5	177861	269312	36342.7	1.51989e+06	191269	368175	541074	36646.4	37126.5	18247.8	92830.3	21174	790465	803817	788808	63463.5	262350	250985	438744	212996
Q32KJ6	66602.8	79510.9	15483.4	61223.8	52726.7	94509.9	80141.4	56224.8	74918.2	72679.5	45282.8	60962.1	44110.4	65504.6	27422.1	52033	48010.7	39884.6	91661.6	103276	54389.9	95991	70565.7	96800	173095	81182.3	27944.8	46147.2	333825	31796.9
Q3KRC4	50947.9	69165.3	99970.6	22362.9	37096.4	40035.2	46796.8	54248.9	71605	41004.7	68896.9	49400.2	58387.6	60152.4	32952.4	40311.2	32182.4	58825.8	46833.5	48550.6	51243.6	56908.9	46060	62584.5	306949	48389.5	96183.5	69427	8.65004e+06	53414.8
Q3MIE4	26818.9	14568.7	20816.4	19406.2	21078.8	28906.1	28305.3	24516	23714	24882.2	43892.9	41807.8	21494.4	47647.4	25472.9	38425.7	37622.5	61572.2	33319.4	27265.9	11100.4	12967.1	35897.4	9468.78	257801	16987.6	42301	27738.9	351504	30102.2
Q498R7	8219.49	1178.91	7302.92	942.951	3127.17	628.524	11056.5	17794.2	22307.7	13698.5	14474.4	15061.5	11624	17177.9	26059	12572.5	4641.42	8317.74	6792.1	2164.34	13615.3	5548.26	31844.1	19936.1	357790	12584.1	12959.2	7516.27	616945	5155.86
Q498S8	132631	152731	255610	203957	171473	153652	112524	95052.5	79216.1	77773.1	64913.3	71129	78362.3	106713	116061	96060	95036.3	66352	127124	185945	314491	160527	238536	123335	3.11464e+07	184245	153669	34683.7	486590	69613
Q499T2	502610	525324	569255	551245	470967	412320	318499	250582	244615	314177	214673	213604	394822	264557	305043	300495	300019	192237	301935	467207	529009	414234	323562	281101	1.50002e+06	518088	520344	351046	539134	364251
Q4FZV0	74324	70383	52610.4	69307.5	62609.9	91354.6	219917	158011	265891	277094	173905	252378	356529	263980	318268	226509	356566	246992	132149	114981	122204	122024	221167	330205	1.71613e+06	268719	91488.7	249811	1187275	153707
Q4G075	16946.7	6953.8	9275.69	10288.2	13635.6	13994.6	18919.8	11620.2	16166.9	32640.2	9121.77	21050.9	3703.97	13781.9	4864.41	26203.2	4936.26	4255.27	23760.5	24001.2	10517.5	15949.7	6819.31	22033.7	359191	5510.6	16704.1	19097.9	616945	28499.2
Q4QQV8	57822.8	50821.1	78135.9	46510.2	41716.3	85095.3	30220.1	59146.9	31664	74602.9	6843.46	30403.6	7756.74	23607.6	33515.8	12572.3	10521.6	12620.9	94634.4	49961.4	59947.8	48994	41138.6	40836.2	262528	57620.9	109484	46430.3	8.55807e+06	48403.8
Q4QQW8	207967	126800	42895.8	218654	206063	196875	249634	280025	145008	299703	254029	290872	395508	314867	211973	392365	425150	265930	128324	184411	185619	195646	373362	292580	439187	268458	578869	330214	325250	285971
Q4TU93	19951.6	43399.1	29125.9	17531.3	17612.1	18057.7	9358.71	8529.21	9876.2	17722.2	6720.74	13376.2	13688.8	14535.3	12563.5	11914.1	10768.2	7168.14	27473.5	18470.4	6620.66	15867.1	12101.6	4047.16	291215	13026.9	1657.16	1675.4	654027	3172.91
Q4V885	106905	309077	297028	154077	112365	131739	93775.2	234874	140321	132006	106749	134143	135308	306662	246343	250135	166385	128975	115697	66475.2	127932	119000	468315	300215	950282	337556	890861	375721	1.14547e+06	286581
Q562C9	163275	119923	266648	224945	144626	152286	122732	127550	74717	121052	91399.1	101470	88495.2	125350	84719.5	95615.9	93980.9	104562	115229	99554.5	151503	97142.5	114237	130057	389953	142419	83605	83403.9	326743	40262.9
Q568Z6	161297	180974	172947	180103	145822	164501	104143	108484	105256	97493.8	90422.8	95058.4	80401	108039	85651.9	61258.8	105315	91951.1	115615	123318	209327	133647	90856.5	124901	443489	144580	106913	102815	158570	128349
Q5EGZ1	20624.9	12910	12327.4	14111.5	9710.56	11832.1	10183.2	4250.19	4963.51	6552.72	11765.8	12799.4	2713.47	18124.9	3649.53	8171.33	11535.2	6248.69	16109.9	6494.89	7034.35	9019.53	7673.16	5322.56	359191	7079.15	11528.9	6839.27	616945	7234.08
Q5FVF9	345702	475399	469454	436573	433353	300927	273276	263514	323369	300707	236784	250087	344398	329275	369860	376672	234922	246614	249313	247144	324747	284662	418668	406779	1.94957e+06	307735	168647	278317	524926	211183
Q5FVH2	111633	94871.5	55100.8	122568	101979	108869	138389	86499.4	63834.8	193949	133589	79017.7	195683	141511	126809	158643	199790	80644.7	105331	112812	56803.7	93209.1	213685	298432	104126	194194	66115.8	127924	294021	98385.2
Q5FVQ0	11203.9	28017	12926.1	10829.3	9799.38	15424	27115.6	25882.1	29668.3	21551.5	52655.9	21501.4	33873.8	41224.4	28805	35618.6	22170.4	19565.7	48675.9	44253.2	38142.6	25444.4	35653.8	43401.4	257801	27375.4	39429.7	28461.4	351504	27586.8
Q5FVR0	1069189	1.02663e+06	2.20725e+06	1.25325e+06	913740	956774	843275	854273	877583	1.03927e+06	790510	950192	1311024	946165	865588	606761	923768	759286	429060	833630	958112	996112	835230	1.00992e+06	2.17309e+06	888961	832199	640172	1.14106e+06	423128
Q5HZW5	322393	505064	604030	467253	390746	383708	238821	157063	171021	165668	122587	155474	227569	186488	176010	170090	190353	146532	253625	272348	424525	302122	223892	206626	132256	220685	284117	74932.6	252569	117287
Q5I0E9	16099.6	18514.9	36234.4	12642.4	29564.8	29643	48208.8	42472.7	46872.6	86612	118210	79626.6	29060.5	26206.9	9887.7	11834.9	11787.8	93926.9	67966.2	27796.1	39514.1	19975.4	52175.2	63076.9	298256	6727.81	125853	73678.2	461643	82859.6
Q5M871	128040	132151	336190	154278	108114	125668	93767.9	102954	79925.8	70931.7	56765.2	81333.5	79282.1	118059	69897.6	68826.6	65880	36416.7	80544.5	121121	61415.1	37234.1	97591.6	46233.6	402402	206964	294152	123788	495241	133092
Q5M876	31958.9	27186.8	44095.4	36367.5	18523.7	25985.9	21196.9	52896	39897.4	56572.6	63149.6	40734.6	62019.5	88772.8	87247.6	83872	59545.4	90997.3	38518.3	27213	53577.2	30557	62166.9	57828.8	335383	82079.3	195347	73397	1.54123e+06	95825.5
Q5U2Q3	33383.6	18927.4	24257.8	25054.4	20281.4	24407.7	38514.4	71413.6	63454.2	45513.1	107738	56116	54512.3	92673.7	108627	115452	52833.5	80973.2	58137.9	27775.2	25792.5	55299.8	75335.1	50706.6	375252	89679.6	133016	89804.9	1.54123e+06	118801
Q5U2U2	19902.6	30979	32966.6	26147.1	23854.3	17919.9	21018.2	15495.6	11523.7	17208.8	11977.4	21454.9	15154.3	18903.7	11638.1	11479.7	11737.9	10311.1	34878.1	22364.9	32110.9	16011.5	14013.7	9200.41	181466	8563.62	15342.5	24498	865648	11424.7
Q5U367	48265.8	28635.8	64928.2	21748.9	41596.1	54178	34031.1	41697	28424.2	25448.4	31031.8	36694.1	25925.3	32945.1	19392.8	29237.5	42470.1	29510.4	74077.4	67648.4	56737.9	96531.5	35113.3	79803.5	518340	64597.7	15893.4	635831	676960	49920.2
Q5XFX0	67066.7	43004.1	52873.9	53788.3	45794.3	42727.4	38612.6	27653.5	21919.7	36174	31324.8	31564	18451.3	30877.5	27295.9	51187.6	16530	22924.7	27332.9	42548.3	64155.9	38401.8	26108.4	40930	377245	36094.4	37354	38327.8	639465	113356
Q5XI43	2.1857e+06	3.18708e+06	5078126	2.14206e+06	2.39026e+06	2.05452e+06	2.98073e+06	2.96046e+06	3.05659e+06	2.19722e+06	2.49442e+06	2440520	2.49701e+06	2.99497e+06	2.49539e+06	2.30256e+06	3096354	2.26715e+06	4.11232e+06	3.29394e+06	3.67867e+06	3.47256e+06	2.85104e+06	1.453e+06	2.46906e+06	4.70132e+06	595539	2.50945e+06	1.82073e+06	783544
Q5XI73	87900.1	70858.6	160890	37594.8	75203.3	117098	56538.4	75296.9	107055	76471.9	102144	76569.3	54129.2	117231	72013.4	56317.7	123629	157328	121264	112333	89020.1	128178	22382	108412	276265	71596.7	82453.9	53738.7	330195	149307
Q5XIL0	39793.8	28926.8	54254.8	34154.9	36920.4	24298.5	38528.7	43300.7	36753.7	37180.7	25596.1	22566	30318	34532.3	25858.7	26640.9	37573.7	26526.2	16945.5	26923	8299.93	24824	42232.2	42371.6	198621	20022.1	42358.2	42564.3	912854	36842.7
Q5Y4N8	11021.6	17491.7	31318.8	16183.4	8295.04	10533.8	5853.74	5001.47	6388.39	7775.31	931.835	4342.75	10825.9	17772.2	7945.66	4898.07	7775.15	7992.96	10330.3	11539.5	17700.2	17486	15657.7	11231.9	314759	8275.9	25554.4	14249.5	616945	9213.01
Q5ZQU0	31454.9	34756	39399.3	25827.4	33594.8	20076	21112.1	33581.3	27878.5	26588.8	21956	25261.3	24069	30196.1	27267.4	17193.3	22005.9	15450.8	30004.7	28665.9	28068.3	28045	33362.9	35285.7	327602	57271.3	19979.8	32475.9	402585	28854.6
Q62632	174359	78722	195606	263959	143029	192470	54589	36967.6	32547.5	58836.8	26101.6	47771.8	38663.7	17661.2	28443.1	35235.1	46585.6	33222.3	61614.8	93524.3	177123	157254	47303.7	29934	397359	165416	95501.6	62830.7	200165	113532
Q62635	6388.75	148392	68163.6	14571.5	26604.8	39428.7	38073.3	21109.2	38000.5	62248.8	96277.1	39808.4	30033	37114.7	3378.63	16717.9	27104.5	7254.65	467155	60224.4	119080	5384.09	27306.8	64436.4	114644	84994.8	22534.1	35163.1	684594	12586.3
Q62638	24590.4	15643	8129.52	21285.9	18639.3	26308.1	19513.7	14742.1	12784.4	19550.6	11944.7	15509.9	14215.7	25562.5	17331.9	11966	17125.3	17365.2	29896.2	33272.3	37765.4	25013.6	26918.3	22170.7	291215	39788.8	34721.4	32388.2	616945	25392.4
Q62740	205085	374829	293210	402153	269318	262170	395996	418596	287914	243909	236513	214356	281162	407554	225264	293267	226546	135857	254074	190102	206324	265584	307577	121499	890232	174714	478747	112373	670233	168556
Q62786	213182	193364	379306	245438	200868	188358	188270	97697.5	109570	136493	77282.1	118278	131732	83885.3	92508.6	95350.1	110413	83253.3	249776	245693	268289	305833	172527	109694	507706	203583	89670.3	125157	475935	107558
Q62867	1.47636e+06	1.05722e+06	2.58626e+06	1.42873e+06	1.94474e+06	1.0885e+06	2.6103e+06	1.75878e+06	2.46245e+06	2.21549e+06	2019009	1.62726e+06	2.56024e+06	1.75905e+06	3.04106e+06	2.91985e+06	2.7437e+06	1.63899e+06	808689	1031060	1416872	1.30786e+06	2.47574e+06	3193482	8416239	4.17551e+06	3.5541e+06	3.57252e+06	8060075	3.1061e+06
Q62893	36716.6	55403.9	51873.4	40892.6	39770	16279.1	15773.5	9902.21	13591.5	10666.7	2262.77	5403.83	7678.85	12120.9	9337.57	4568.15	11303.4	16285.5	39737.5	36325.3	67419	24876.8	21323.4	26785.1	257801	2940.34	24817.4	18729.7	384448	19295.3
Q62930	35636.7	46105.6	26285.8	51656.8	51058.4	60355.3	130593	143922	200329	142905	160669	130830	156479	221290	143407	173454	119677	119811	86983	139652	70830.8	91894.7	116118	157773	4.23229e+06	86021.5	143006	162916	56807.6	155806
Q63041	2.18732e+06	2.46097e+06	3.1597e+06	2.29288e+06	1.89322e+06	2.17728e+06	2.82066e+06	1808764	2102329	2.01324e+06	1704203	2099746	2.66046e+06	2.08421e+06	2.19641e+06	2.16388e+06	2.40727e+06	2.06483e+06	898219	1.71878e+06	2.38027e+06	2327539	2.9246e+06	4749370	2.95791e+06	3.9403e+06	2.20527e+06	2.53041e+06	6094904	1.93125e+06
Q63072	15328.8	18713.8	27308.9	18874.9	15851.7	15838	15661.9	11426.3	14960.7	12919.2	24414.9	14884.2	18245.4	14105.3	14146.3	14155.5	18295	13100.9	24009.5	14255.2	10550.1	14529.5	7361.23	27242.7	327602	15847.9	9660.67	18559.9	616945	11823
Q63083	51762.5	30078.4	71328.5	37409.5	37312.6	52681.2	109981	102618	107751	108611	58405.4	64902.3	110918	134562	123422	102543	116429	58527.8	31363.7	25059.7	8467.69	82138.5	56161.7	86323.7	17044336	117518	152590	146570	207249	123537
Q63135	40953.5	80139.7	98130.8	60794.9	51099.4	49437.9	82012.8	56116.3	65311.6	154461	39692.5	64783.8	61019	133896	99443.2	90238.2	64048.5	107838	82039.3	60855.9	98109.3	53172	167873	222548	1.64846e+06	124036	182790	722835	2620915	167951
Q63257	3.07887e+06	3.15899e+06	3748289	4661801	3.92247e+06	3174620	3188500	1738430	2228615	2.61504e+06	2.24254e+06	1841872	2431061	2.90413e+06	2.23572e+06	3.20783e+06	3.06898e+06	1.45362e+06	1.45213e+06	3209024	3.30419e+06	4.40681e+06	3.22142e+06	1.71859e+06	2.02656e+06	3761286	1.75273e+06	1.00597e+06	2.33721e+06	2.05876e+06
Q63270	8325.28	10255.8	12768.5	11739.2	9809.13	3282.08	11312.9	13054.7	12168.4	8469.63	27325.3	20616.5	1991.44	19443.3	4592.9	11751.2	3365.24	12914.5	13013.6	5811.19	5121.06	6601.33	6010.56	5655.75	257801	6965.19	18822.2	8855.33	460028	7185.47
Q63279	154022	306882	163190	226522	353168	304546	494526	288243	286522	301269	536223	163943	549714	1511008	312045	333497	543032	236813	343994	158076	151683	770437	170440	275299	634274	139729	631870	623236	917209	353531
Q63313	2575.42	22371.3	13266.4	16714.7	26229.3	14777	18009.7	21757.5	21582.9	18887.1	32931.4	17947.5	16372.1	25130.6	19739.9	25318.1	44318.8	18880	160160	73164.8	148150	71597.9	31245.3	50062.1	247718	42831.3	4579.83	35240.7	314147	32407
Q63317	557992	564731	1.21785e+06	389153	546918	363828	467854	310585	431381	330641	287989	278880	317578	612522	209425	258459	360679	306417	511133	603744	820488	719204	722393	166023	916339	1.09557e+06	1375428	734409	26576.1	984145
Q63416	114855	151552	185728	248960	143293	135657	208512	222311	258370	315397	223780	296060	197732	252443	211062	268795	315159	167960	221766	180972	196343	184299	361375	347601	586455	236071	222356	177369	800310	273516
Q63424	24304.1	2582.28	4038	13063.7	1303.88	16469.3	30137	36017.7	28380.7	47483.2	83855	57924.4	17563.7	28252	6439.02	17110.2	6496.38	69505.3	38608.6	29677.1	23276.2	3406	27910.8	13398.9	170139	4077.82	143520	47940.8	905703	59396.8
Q63467	533470	117911	1.1909e+06	593281	382516	408908	533992	212329	212181	829961	125398	120800	228591	353363	559364	339842	200596	151348	270102	201792	608622	652963	305780	255597	330817	408737	1.86966e+06	1.29843e+06	867701	1.19683e+06
Q63474	42982.6	58983.9	27396.6	38324.8	43297.6	35276.7	49302.5	33398	37703.5	27667.6	28915.1	30094.7	28295.5	31461.2	33923.8	30059.3	63406.3	32644.8	24546.3	61440.3	82941.5	62431	46786.3	40767.8	173544	43096	29038.1	19037	8.28803e+06	45231.1
Q63475	21557.8	143745	37192.9	26661.7	25130.7	14053.4	15534.5	27443.8	29788.2	84123.2	15549.9	11182.2	44318.6	40527	39057.1	30335	16485.6	11480	27775.5	28609.4	32719	20643.3	32556.3	45259.4	342430	36733.4	94877	57516.8	8.52689e+06	40521.7
Q63514	42329.8	76900.4	42973.9	58243.4	55257.8	47574.9	58868.1	27278.2	40893.9	46902.5	37981.2	51982.7	54326.7	44877.9	45543.3	43992.3	47383.4	28840.5	43867.9	21782.3	20425	16335.2	36096.4	40149.2	312977	68688.1	44558.8	23332.5	35184.4	29356.4
Q63530	47863.3	34215	53541.3	28831.1	16756.6	11688.4	22912.7	39983	67435.4	53799.9	77365.1	51714.7	27134.9	82081.2	59072.2	56817.2	41098.7	63409.2	64844.6	46256.8	59202.7	56429.4	79259.5	40534.2	386659	58219.8	82114.8	39863.9	8.56528e+06	50195.7
Q63532	114715	196331	116659	53645	63351.7	113981	142169	42149.6	65169.7	371691	47487.5	51352.8	41138.6	59380.3	60316.5	57082.9	68829.1	82915	82408.7	61176.6	187134	79044.7	22111.6	39130.5	271819	56946.8	39718.5	67841.8	583430	75040.6
Q63556	2.71101e+06	3.43063e+06	1254165	996106	2289689	1.77036e+06	983387	1.64624e+06	1.743e+06	2.09494e+06	1.30476e+06	1.14998e+06	2.15457e+06	2869598	1.68717e+06	2.24233e+06	1.81788e+06	1.20216e+06	1.09095e+06	901895	438016	244173	4.34038e+06	4.37106e+06	2.01026e+06	1.70402e+06	2.48141e+06	1.92988e+06	3.44488e+06	2.05369e+06
Q63598	68263	73004	67369.1	47089.7	76372.9	51026.8	73593.6	54164.5	38633.3	78051	64988.2	37818.5	24728.9	65833.5	66060.1	49957.2	68215.1	37606.1	64936.6	63409.7	81650.1	65080.7	91438.7	98163.4	355006	77060	69676.8	127698	816885	89332.2
Q63621	316259	459822	572120	351058	381387	290894	317535	287235	314124	311247	317076	274432	386303	322579	327857	366201	336992	279630	419402	325466	381072	281291	432092	444508	922213	424438	506744	323444	115612	317666
Q63678	28807.4	38207	16377.4	24871.1	64214.5	40989.1	43059.3	79681.8	76122.5	57188.1	49023.7	56977.1	90590.5	91373.2	85342.1	71998.3	60089.9	49235.4	37914.8	35986.6	27233	23362.5	52189.3	39025.8	308268	52679.3	171438	88686.4	2.72354e+06	79626.9
Q63691	278350	223091	118975	251303	231243	252505	223433	159899	131329	258310	194476	230627	156218	153519	114480	148382	264989	147704	197049	177994	192233	247802	172504	80280.8	351290	134941	40292	74266.1	428493	98209.2
Q63716	43292.3	29706.7	36643.9	30202.9	53424.7	43261.7	49400.7	68395	71236.1	58336.2	117466	60588.8	38546	74971.5	100305	92645.5	46360.2	77504.9	105775	65411.4	110448	69309.4	71192.1	122440	370808	93182.6	117780	153187	983451	142468
Q63751	199815	14009.2	31203	74056.3	72794.7	91410	199593	43660.7	93425.1	294421	141379	95427.2	536272	163670	181062	254652	372659	207574	139147	48128	168961	41540.1	115635	159456	195256	37775.1	112937	67200.5	345550	69971.4
Q63772	164996	111318	28203.6	97124.4	107115	89979.9	122099	81597.6	90090.1	150121	107939	143664	199979	92424.9	96442.5	141985	132518	130449	271655	206484	304675	451620	171217	229374	405409	102553	140655	216244	149776	150747
Q641X3	36253	45795	53245.8	42573.5	46331.8	52024.7	56002.5	53098.6	98892.2	68743	33414.8	55361.9	71055	65575.7	83773.8	88375.5	67293.1	46265.2	34856.8	34591.9	47603.7	42884.4	53687.1	69038.8	517126	64555.5	37120.6	53067.1	1.51467e+06	75163.1
Q641Z6	37254	4319.69	5825.25	43831.4	20643.9	19363.9	489467	45034.1	52805.1	70777.9	125242	76985.9	93760.1	63522.3	21163.7	41164.9	49430.9	124563	48414.6	956180	23005.4	6539.12	296825	25608.3	1.10425e+06	3.11916e+06	38006.8	13400	543220	15832.5
Q64230	3.69965e+06	4.32138e+06	5823928	4.17148e+06	3.75078e+06	4561254	2.23651e+06	2.37861e+06	2.19709e+06	2843237	2.59366e+06	3.05344e+06	3145916	2.26675e+06	2.66029e+06	3295603	3.30495e+06	3.40424e+06	4628306	4309835	4.46943e+06	3.87318e+06	3247069	4.07303e+06	1.4617e+06	3.05603e+06	3.03632e+06	3432063	868551	3.20786e+06
Q64240	1.80581e+06	4.4536e+06	5558946	2150959	2.65709e+06	2.21661e+06	7816194	7.69915e+06	5449995	4.42326e+06	5024653	5.62675e+06	5.80104e+06	5145051	2506162	2.95474e+06	2.74195e+06	2923469	2.06805e+06	2121345	893172	2537538	5199854	4878829	12795668	3410081	2.66995e+06	1.71369e+06	6646531	1.65876e+06
Q64268	17343.5	24554.4	1440.15	11153.5	16868.6	23710.4	18923.8	21400.2	23245	20570.9	19015.4	29744.1	17329.3	32198.6	16990.7	18159.3	18530.5	38666.6	96874.5	131181	93044.5	65634.6	35577.7	40892.5	356444	31850.2	81903.7	46806.5	781642	54351.6
Q642A7	982010	1.26501e+06	1.78653e+06	879845	942440	953670	610677	814532	621105	519351	563197	611245	715823	778609	718164	820288	642466	627058	615559	567868	1.04867e+06	1.04619e+06	946277	881865	960231	1.10312e+06	643589	609403	611301	631505
Q64319	281380	64840.9	190679	124050	142937	182087	752493	607641	687066	1.03111e+06	1.56312e+06	1.1361e+06	293701	286093	137044	296726	315628	1.06791e+06	540434	365549	325399	182298	535720	533247	219297	262093	1.00082e+06	456834	604949	555588
Q64573	36850.9	102404	39530.8	21840.3	97468.2	32184.8	89221	126296	81754.8	50148.9	159223	59601.6	137744	86445.6	130859	306326	77132.4	49044.7	49572.6	57648.5	46566.8	81770	117251	51609	274973	131763	169186	80998.6	507638	185831
Q64602	72000	40457.7	54680.1	22284.2	52624.1	18987.4	41862.5	60228	95386.6	88616.3	181618	86986	108551	96626	77977.2	117625	88855.6	99606.6	104024	23639.7	35124.6	42794.8	51120.4	45054.3	310864	43829.2	162147	56210.4	1.12542e+06	82148.4
Q64604	15550.2	51271.4	111624	16721.9	59161.8	59188.2	45476.1	36016	35406.8	43962.2	31163.6	35087.2	31022.5	47598.2	34836.9	19615.3	47725.2	58355.8	63748.5	56951	86934	65717.4	47580.8	75641.1	106908	110797	67199.2	57017.1	213205	66745.5
Q66H12	59002.5	72636.6	72698.8	64265.1	60711.6	75920	107967	131380	168306	134519	140857	146607	161967	191470	195684	173925	192636	130467	54510.1	54405.4	45306.2	52270.2	119411	207571	3.50503e+07	110254	70707.9	128016	7.72924e+06	96511.7
Q66HG4	23588.6	29721.5	27363.1	18383.6	12409.9	22624.9	32218.5	74095	69758.5	31956.7	91174.6	48063.7	51692.6	113726	98014.1	98739.2	57518.3	56761.2	57865.5	51318.9	94184.6	70489.8	68462.1	83647.1	391839	53793.9	46849.1	43819	779973	23505.7
Q675A5	23144.2	27489.7	14216.9	11865.7	38019.9	19331.7	28714.9	59886.9	47141.8	40328.5	60854.4	46093.9	60120.3	31138.5	57789.2	65631.1	58079.1	33986.4	26571.7	15913.1	32623	30399.4	69943.7	76193.9	335088	82298.7	23801.8	81007.6	584804	49346.3
Q68FP1	720072	1394698	1.28864e+06	789451	867184	429985	2.17213e+06	3.80144e+06	2.96268e+06	1.46384e+06	2291137	1.75793e+06	2244113	5680825	3.7547e+06	4.05806e+06	3161478	2.14307e+06	776205	689897	751433	925220	5568391	4.01819e+06	1.88221e+06	3.51032e+06	5966325	3563043	2.37545e+06	2.69496e+06
Q68FQ2	332281	457468	684357	486094	407528	142335	190508	177455	225386	189506	134616	150912	284200	1.2789e+06	148271	162149	195479	104177	296930	308099	602794	415110	309079	285858	1.91836e+06	298815	153949	146819	1.15676e+06	118611
Q6AXR4	130443	177646	256511	173233	127645	208062	72766.3	139983	167029	109322	109413	108767	133702	157521	255257	202943	149943	109493	56856.7	59945.4	139886	110515	132769	198538	750204	166966	197391	125428	565501	144088
Q6AY82	39557	36152.7	60880	42701.6	46487.1	31618.9	16155.5	8646.23	8309.53	18536.1	13366.5	14521.8	19810.7	18955.5	8079.59	5084.65	5534.57	6754	46516.2	46764.5	48757.4	43995.2	24131.7	27885.5	377245	19343.1	8099.79	22971.8	402941	19898.6
Q6AYD4	380929	633841	815346	289554	286367	225949	313361	383800	381718	270616	302981	302438	360733	299368	404836	262194	291755	251710	527857	179987	733738	558123	519989	501497	373245	537684	395632	338955	942642	384514
Q6AYE5	78055.5	63057.4	67197.9	58379.3	59906.8	85871.8	57209.3	59224	61812.8	58255	40547.8	51766.7	60997	80671.4	55066.5	41546.5	50017.7	58911.7	48036.1	46359.3	91311.1	98820.2	56486.4	114326	158047	76184.3	46500.2	81908.9	205705	43755.9
Q6AYP5	241398	254070	402360	339911	284563	227444	125494	51879.5	61221.6	99918.1	113598	116106	151666	67456.6	70429.2	82796.2	88617.3	90413.4	166357	179889	201928	212496	118226	167811	764712	97935	63319.7	47338.8	718384	64512.7
Q6AYR9	108091	84688.2	53025.7	48990.3	90092.6	147058	38496	68945.8	24148.8	21952.9	81356.2	88835.1	52373.5	89326.1	30915.2	122812	26402.4	113354	189400	80364.9	100304	84825.5	37150.1	215741	404229	54080.7	114529	125403	1.08476e+06	115227
Q6AYS7	38426.2	22276.7	22015.9	18953.8	5072.55	17952.2	66935.4	113295	152729	103429	157534	58372.8	54716.5	83982.9	188456	113603	131629	136515	37695.3	27864.9	40376.6	50322	48428.1	28764.6	77113.7	32999	169088	81531	962118	126520
Q6AYT8	161180	198468	302801	288102	145358	203927	116428	123615	70239.4	177595	78498.9	140197	47939.2	148608	72759.1	65435.9	50134.5	112500	124098	183393	249292	265098	111127	137106	883068	150347	231515	88693.4	713017	104725
Q6DGG1	288654	267400	464009	232382	304730	183746	462476	542007	425125	340706	571019	396656	409699	757044	614981	752811	510281	413774	366624	281918	503624	311974	605205	672014	1.63722e+06	544614	257829	419300	823868	332954
Q6IE52	147230	347785	184405	102700	81540.6	126009	130096	132138	209585	114236	151104	134562	252391	322823	115616	168459	94538.3	102145	67222.6	127907	86483.1	73240.1	71230.3	170021	4.55589e+06	118266	251049	148323	502560	349589
Q6IFV1	59625.2	127652	70414.1	97140.8	109637	83395.1	357030	151449	154668	202384	239880	101637	271083	855247	183190	173560	296610	142302	62237.7	63073.4	45869.1	122505	44516.4	88467.8	148499	66207	445599	336750	249408	172887
Q6IFW6	108047	277412	92289.1	168988	146760	110777	332414	218834	253884	292766	182097	138037	247787	1.23603e+06	302973	214070	198930	185637	72971.4	69452.6	57012.7	78112.8	76640.3	131699	230103	29681.8	224937	157655	183610	106645
Q6IG02	53440	117112	47182.7	81210.6	78823	60738.2	264752	118508	147122	167876	138360	85464.2	345276	1.20162e+06	292269	113683	148920	98103.1	35103.2	41786.1	32121	59634.5	60714.4	140629	415515	62267.3	186467	109497	564178	145831
Q6IRK9	411729	539335	644068	381342	608332	495272	950262	1.1926e+06	1.59614e+06	1.45079e+06	1.43885e+06	1.33044e+06	2121603	1.61301e+06	2.53764e+06	2.59712e+06	1.97047e+06	1.44875e+06	301883	464470	629070	752303	1.70968e+06	2240022	2.07999e+06	1.8813e+06	2.14538e+06	1.41493e+06	3501065	1.18352e+06
Q6IUU3	124041	139746	372248	211316	139893	179477	66056.2	68489.5	85861.4	75365.6	72510.6	61664.8	62598.7	90303.6	118853	81061.9	102174	61546	155985	147401	321856	150250	97754.6	182865	252792	162432	27401.5	129432	440224	75477.8
Q6MG61	50259.4	33523.1	85166.6	35334.9	73435.8	1857.1	57893.1	90777.2	109778	74608.3	126909	80900.5	55287.9	119266	126572	112765	81809.2	123131	48442	43051.9	34975.2	29707.5	134869	128766	3.66152e+06	80779.1	241234	61883.5	922886	97804.5
Q6MG71	207856	125129	162415	94618.8	139815	206661	165483	195507	112382	127091	140502	174873	186622	183187	44299	115356	137038	163100	241180	215442	93187.1	174156	337178	209058	3.1411e+07	127695	249431	226470	332343	264989
Q6P6Q2	149313	353376	171457	256471	263267	193673	721014	361269	331178	361634	711685	228368	530518	2152981	503849	375606	567110	404978	81678.8	118909	42144.9	271687	116274	248612	809814	93939	571848	414050	863897	328628
Q6P6S9	27424.1	41256.9	30469	18076.1	23235.6	18509.2	43852.2	38816.2	40604.2	33372.9	54355.7	39900.6	45681.8	53830.4	43262.5	59432.4	38766.3	28132.4	16924.3	21547	20729.4	14639.9	44340.2	39597.4	257801	27964.8	41037.9	27968.3	317763	6607.13
Q6P734	32808.1	37090.8	49768.4	16977.8	39423.3	38794.4	51424.4	69698.6	110144	28079.1	77646.3	55157.3	50329.9	209810	94489.3	104225	59751.9	53190.7	80199.1	120950	97169	70477.3	47036.1	126771	3.74807e+06	104421	110681	93903.8	1.11035e+06	134020
Q6P767	894077	522878	698557	681644	756147	597573	501736	462921	511400	823571	691084	396316	699805	612947	654294	669231	611628	883956	580865	730135	880354	826879	545288	762775	602422	627996	688880	632849	35077.5	506528
Q6P7A9	441444	82315.4	219322	435472	247281	279044	549793	408565	597662	637298	381424	493090	662408	372730	662193	524302	720062	477378	191621	160541	173889	129734	609426	613319	570317	336356	536644	414354	3.60083e+06	529311
Q6P7S1	88959.3	104288	99430.6	118833	77455.4	118426	78897.9	83616.3	79665.3	145906	94341.4	98413.9	137898	101851	174880	123183	163135	133754	89326.6	90944.7	87696.1	103545	98438.2	92005.6	3.56972e+06	120869	57334	66261.5	153196	61959.8
Q6PNM1	36487.8	58705.2	46026	41953.7	38377.8	31871.8	35379.4	34419.1	21484.6	32108.3	12226	29104.4	32430.1	38962.6	16952.2	14986.9	45664.5	28760.1	21662.7	37154.7	46325.6	54224	27865.7	28433.8	377245	23034	27962.2	24138.9	382202	21686
Q6Q0N1	55389	57708.1	38770.9	39944.9	57568.2	33235.5	35860.9	71669.1	66114.6	44370.8	13929.8	59869	83439	81762.7	69882.4	91039.5	57476.4	118543	76815.2	57107.8	77538.5	84833.8	44050.8	78865.5	391839	67555.5	48807.5	67607	1.07718e+06	61275.8
Q6RUV5	86215.4	49029.5	46099.9	49070.9	51515.3	127254	65815.8	121465	73866.4	104324	157540	136795	41358.1	68874	61740.6	66119.8	49084.6	207159	183292	81017.1	139207	91252.5	79605.5	96359	403441	66075.6	162622	122964	630242	125392
Q6RY07	188618	342897	304747	189656	315499	129674	145190	107239	109463	89722.6	79224.7	40068.1	98785.9	76296.3	105590	125586	133962	82509.8	146277	137820	100689	114268	55163.6	114418	342883	73566.8	60936.1	59421.1	373420	55447.2
Q6TMA8	51349.7	56964.6	42893.5	44986.4	96826.7	39161.7	122495	60090.9	67254.6	80772.3	63399.4	105712	148429	114006	102022	146247	180318	108070	54313.1	48667.9	62852.7	68004.6	171534	147585	3.6445e+06	18568	42815.8	119704	511155	68608.8
Q6TUD4	13693304	7.87236e+06	30916822	23997532	15033156	17796546	12392459	6242813	7702890	10381066	4.83471e+06	6.90797e+06	17637116	8495749	7.10009e+06	6.78188e+06	6250556	6.07204e+06	15885079	21382944	8642419	20623166	11101341	19087890	3.88379e+06	20330128	27632372	17022298	10320968	18914060
Q76HN1	88369.6	67333.1	116761	82466.1	67397.6	61873.9	85765.8	59764	96697.6	106432	46520.9	71191.7	106230	55815.2	116879	84762.6	95135.6	61632.1	36278.2	57570.8	20034.1	48997.6	86298.6	70422.9	394259	130746	21328.3	70635.9	941402	56404.8
Q793F9	66293.4	43060.6	80232.8	43340.1	53809.5	92043.8	50735.9	43944	50777.5	42332.3	55294	48837.7	26116.2	42882.3	39386.6	38135.7	41808.5	79188.5	54154.7	60411	85037.6	72211.8	54124.3	59336.4	196561	72912.3	43827.4	64033.2	287130	67626.3
Q794F9	66219.2	75467.6	110887	87760.2	75408	80017.2	46413.1	39786	39005.2	45010.7	42874	45016	52570.8	69918.4	58138.8	60868.6	60298	61897.3	54596.3	54730.6	84790.3	78082.9	69749.7	66199	168454	77803.5	42878.5	45745.6	259157	48528.7
Q7TPB4	67231.2	81097.7	165834	76700.8	106469	50555.5	54730.6	46579.7	50287.5	40931.3	32817.6	39597.9	48562.5	47551.6	57536.2	55643.9	36855.2	48887.9	103832	63344.9	80679.6	90138	123336	89177.7	140270	85916.4	100998	40435.1	372571	87940.3
Q80W87	35034.1	44530	52937.5	52834.3	45088.3	30688.8	22571.6	22403.8	32710.4	24807.8	23230.6	18565.4	47816.6	30322.8	3480.33	17158.9	20738.5	17565.9	60410.4	38769.9	41370.6	48289.6	27522.8	3942.84	377245	31525.4	29252.9	21400	639465	32085.8
Q80WD1	174152	197375	198263	173175	158813	154570	122393	108520	112779	107547	88483.4	97835.8	130045	84126.6	133697	125981	135791	94638.1	198525	170828	239623	287998	176208	169373	814280	161348	72789.6	109559	264198	80865.2
Q80WL1	11034.6	8830.44	12693.4	12823.6	13863.8	7826.8	8147.38	36046.4	17212.9	23653.9	24962.3	31006	11229.9	22615.5	19150.1	25610	29325.8	21677.4	10561.4	12881.9	10017.1	4899.35	15013.6	14985.5	217853	12071.9	21352.2	22149.4	616945	20520.8
Q80WY6	21463.4	34777.8	57959.6	63983	30005.5	26373.1	61884	64861.8	72418.4	52407.8	46964	60673.8	93910.7	81903.4	74223.5	87473.4	75526.5	68407	76169	33748.1	54397.9	53079.1	104841	37449.8	316293	85496.5	152400	68371.2	1.3302e+06	78587
Q80YN4	58076.9	22174.7	49506.6	68580.1	33991.4	40085.3	9493.73	15284.7	1837.33	5641.8	11219	11816	3544.35	21514.7	68628.7	6222.26	15874.9	2795.11	37961.9	44478.4	40477.9	51298.6	20817.7	33956.9	327602	41959.2	27186.7	27327.5	394026	13203.2
Q810F4	106262	116666	164403	111646	82513.2	91001.7	78932.7	81987.4	80909.8	87245.8	59789.1	72052.1	116766	71180.2	81042.6	61227.5	77256.2	74952.9	66017	71527.2	117004	82829.5	70553.4	84464.7	604232	103650	84604.2	69675.6	460490	82362.8
Q8CFN2	11183.2	7826.28	4338.55	7407.48	8126.95	20885.6	12065.3	9895.18	8046.36	7260.43	17730.9	10680.6	6410.86	9422.46	11553.5	4442.89	7958.19	16953.6	14563.8	8371.29	7060.54	11000.4	8495.35	13309.8	179381	11022.5	20278.7	9921.48	616945	11487.1
Q8CG08	230315	135302	367588	306129	209946	258585	150393	80968.8	135962	115641	72575.9	112942	134504	68778.2	70480.2	85539.8	96977.1	67686	276727	263178	358046	271697	167511	119158	4.12499e+06	97654.6	166674	73205.5	3376246	54681.9
Q8CHN3	2.04945e+06	1.6507e+06	3.93522e+06	2.57009e+06	2.51807e+06	1.45357e+06	1.51885e+06	1.18471e+06	1.07983e+06	1.79372e+06	859723	707386	1.36061e+06	1.63188e+06	1356342	1.86681e+06	1.28602e+06	920764	1.39687e+06	1.51936e+06	1.76606e+06	1.82225e+06	1.41512e+06	1.52143e+06	1.03333e+06	2191124	2.4212e+06	1.33511e+06	3.52888e+06	1617357
Q8CIZ5	12414.7	11144.7	60787.1	25491.2	23180.2	13873	18799.4	38185.2	44807	15915	44470.7	25900.7	74735.4	63991.6	25730.6	38006.1	40744	23781.5	351414	1697.21	60712.4	9060.59	22861.6	120731	109326	26571.6	12508.3	68550	338362	17529.5
Q8CJD3	7870.01	4470.53	144543	4293.23	10478	5853.77	22404.2	11264.6	173062	21787.5	22625.6	44009.6	300449	94896	48786.2	50661	30801.3	51682.7	179378	17530.1	15449.6	7208.59	43166	1319289	368427	77729.2	51833.4	504437	61797.1	22322.2
Q8JZQ0	50055.4	76275.1	80120.7	48421.2	28625	39468.2	28318.1	61925.7	61108.9	32005.4	48559	43976.6	61105.2	56594.1	48277.3	58075	50179.6	36004.9	74867.6	32668	36138.1	31358.9	76293.4	71780.1	276565	52823.4	64106.5	42781	8.46402e+06	34022.8
Q8K3V3	65955.7	119840	118013	82512.8	84949.9	84810.3	93429.4	84543.7	103535	100546	57568.2	62199.1	121361	104989	292799	92178.6	117036	188220	100174	107394	88457.6	113030	116297	95698.9	3.52215e+07	106004	103352	152395	7.77279e+06	115353
Q8K4G9	47070.4	46010.3	58136.9	12439.1	19134.5	39190.2	74829.8	26893.1	28400.9	57774.4	44331.3	57047.9	91490.6	78166.6	59703.6	52125.8	106506	62898.9	44124.6	46404	45953.2	28931.6	56235.4	55194.3	304795	29637.7	44068.5	44391.9	8.50742e+06	26355.4
Q8K4Y7	15117.4	16408.5	23121.2	7197.44	25916.5	22011.2	19010.3	12675.5	16586.4	11596.2	19747.5	16747.7	14298.8	16054.2	20209.1	12700.3	17979	19689.9	29231.1	12074.8	17795.8	20023.4	16332	21183.6	146276	14573.7	23995.4	18189.8	616945	12459.4
Q8R5M3	71827.7	55318.4	18807.6	63335	121725	65704.1	79321.2	93218.1	61916.5	48230.3	76313.4	73968.8	40877.8	69249.1	42320.7	61663.4	77079.4	51095.5	107682	123530	89216.3	114835	109630	103310	130110	62950	35503.9	39429.8	253072	6926.91
Q8VD89	3992.03	14482.5	9780.7	4797.55	13315.1	1220.05	25704.2	19185.2	21629.3	21370.5	11699	16883.6	15494.5	21117.7	38543.3	16496.6	9379.86	36611.4	737.18	15832.7	50558.1	12180.8	12752.2	32701.1	257801	21773.4	33926.4	63606.6	616945	46625.1
Q8VIF7	28115.4	18541.4	31995.3	26624.4	49685.5	33150.7	33816	39781	41930.9	23578.1	55433.4	46397.6	23923.1	119745	45188.6	50598.4	28889.9	42185.2	160027	34511.2	44606	40552.4	41209.1	17774	288926	33797.7	30005.3	23896.6	8.06906e+06	23082.2
Q91XN4	126377	168512	339581	274141	181525	227639	200363	193415	143451	175361	99035.5	169811	73090.8	239142	152955	47539.9	108378	131044	117176	147962	145953	122620	251924	188307	1.1309e+06	166635	526027	268835	1.75613e+06	103009
Q91XT9	34473.2	60376.9	120805	49818	52600.2	46912.9	33269.1	51075.4	56621.2	28218.1	27867.8	37272.7	44633.2	48018.4	32456.7	42932.1	45226.8	46654.9	57628.9	34180.4	36859	46282.3	40602.4	158141	273466	83576.2	30926.6	83166.7	293460	71694.6
Q920A6	74078.5	38875.2	51819	75172.9	108853	134413	294888	294650	295715	293453	356190	334248	392128	228715	553799	502523	400859	371422	48732.4	43532.8	34594.2	77685.3	249110	294994	456397	245732	196075	321597	122752	225734
Q920H8	9076.23	10628.6	8904.17	7046.51	12867.9	9061.81	1482.84	5462.34	4979.66	4357.44	4165.01	5373.09	5822.09	18437.3	4651.93	5608.7	5848.95	9433.25	16449.3	15780.4	12602.7	13419	6809.75	8542.17	179381	6722.65	8024.83	5500.98	685948	9963.15
Q99041	242111	164241	183465	668893	679279	517713	287608	233808	241779	122951	366103	1629110	424125	295563	407947	255135	530841	192041	734281	387257	1.57662e+06	389058	1.93243e+06	2.13703e+06	1703612	512672	945387	1298205	1.63842e+06	2.34488e+06
Q99J86	199831	263414	377404	315797	219812	251231	109199	100029	101539	117032	79193	99700.4	114008	118146	92220	81167.2	118451	107106	176007	191265	268532	239296	158974	242259	2.36013e+06	225683	157777	153992	1.02419e+06	166029
Q99MA2	202150	98917.7	96834.1	138146	103759	133478	205392	215891	170085	295566	303374	254187	254738	384779	169632	150542	257734	397767	259888	211334	260280	174663	242328	248811	577260	174076	442585	326638	427989	282763
Q99PP0	64889.4	104565	119556	101089	70257	76187.9	41424.5	40791.6	24588.8	22007.6	10134.3	17519.8	4170.81	9388.08	6117.37	4480.23	22585.6	23001.6	74726.2	52068.5	69636.5	61472.5	57725.8	37152.5	213641	36261.4	28141.7	21406.7	8.18093e+06	25051.2
Q99PS8	1681283	1.13487e+06	2.88513e+06	2.50815e+06	1990185	1363361	690671	375590	446831	313608	346151	378915	308277	335940	375043	511488	370928	279428	2.12828e+06	2317630	2212489	2.52474e+06	401846	443617	5.30087e+06	603279	267370	274984	7.64496e+06	296522
Q99PW3	91262.4	129479	69610.3	76676.7	90848.9	93058.3	65877	72504	66422.8	59793.6	56137.5	44551.7	106894	71511.5	67852	80238.3	61144.1	45995.7	70809.9	138992	165582	73165	72979	89297.4	171001	41938.6	37979.7	49735.7	332471	44592.8
Q99PW7	8350.51	7692.86	14573.9	12093.7	8506.03	9300.23	3598.15	2108.69	4802.71	3543.66	2115.2	2278.31	6001.57	17062.3	1975.19	4649.44	5315.87	3190.73	7639.68	4524.36	10860.2	11321.2	2012.93	4308	291215	16945.3	2692.94	4563.31	616945	8850.31
Q9EPB1	570724	366953	611530	516988	669904	491017	366268	370474	405764	377573	399664	270407	313708	451235	485505	991868	410143	336232	455902	429532	567443	509592	890644	709904	579100	826772	717522	559085	3.00001e+06	685571
Q9EPF2	219484	353448	123236	169603	199135	183326	120608	100160	98960.8	85645.6	103088	83575.4	74961.6	65938.6	81144.6	82535.4	96327.7	82485.7	238545	254793	255900	261981	113949	123656	425244	35766.8	46815.3	26583.9	380720	56195
Q9EQV6	59201	29897.7	15475.9	57754.4	55697.9	61721.6	98054.6	90585.3	75750.3	100871	92672.4	99534.8	170570	105160	115587	175861	128553	102655	56916.8	34822.5	89740.3	52840.3	117835	118898	305267	49402.3	73674.2	100286	516120	86062.7
Q9EQV9	33042.7	56108	49086.4	35032.1	32747.9	35966.6	45276.4	67987.5	94361.4	66424.4	55856.8	50801.5	88744.9	48430.2	87042.3	65632.6	64482.6	33457.3	355486	219527	182305	277775	60151.9	70279.1	160253	74271	55492.9	56714.4	438101	38256.3
Q9ES87	551169	498686	880328	633221	469301	468980	457548	354076	503456	317178	253591	377934	485481	242778	431056	288323	422355	343126	506815	559348	727083	617710	618063	373830	3.38696e+06	713234	69410.1	313450	290791	352376
Q9ESS6	177731	311750	302251	216895	173075	106088	146609	148412	158233	112528	120226	126661	182011	121831	139968	104154	122104	107329	197996	143584	219639	169915	146117	126725	222497	125474	24694.9	76770.3	185407	64896
Q9ESV6	52502.4	35144.7	30851.5	14973.4	51863.9	60928	71861.7	103538	77415.8	89585.2	127418	86946.5	43686.8	123164	107129	118338	56779	124786	56310.9	44559.4	135149	194163	67035.5	70949.3	3.59572e+06	95216.9	275244	145428	622162	135214
Q9JHB9	75630.9	53684	68087	66773.6	107484	187806	40039.1	80310.8	56457.7	59864.1	63951.5	93827.9	95156.9	81141.5	48693.5	110565	28037.8	215205	152613	71817.1	78780.6	62690.4	46847.7	63909.5	442682	106854	57438	172513	1.08476e+06	68886.3
Q9JHW1	30817.1	25926.6	16504	32367.8	28195.3	43837.2	34201.7	35735.8	24833.7	23730.2	32600.4	43408.9	33763.8	18245.8	44592.4	22296.3	27403.2	30697.9	37585.3	30330.6	35929.3	33742.4	84071.9	77639.3	377245	26764.1	82103.9	27063.6	351504	61688.4
Q9JHY1	660140	727701	1.06407e+06	983253	750119	692255	579978	414759	417700	554771	270692	359948	466189	239055	530345	550005	434662	317921	351538	462110	916501	897826	628702	400444	381569	644635	746183	518555	870005	615069
Q9JI92	116108	133493	90284.3	84783	83450.9	146030	68097.8	93751.4	78325.9	73083.2	92300.1	114360	84611.3	60944.9	55543.1	82968.6	78637.6	100536	92849.9	83888.4	126973	97940.4	98296.3	115868	458181	106760	113832	80612.6	1.90089e+06	87506.1
Q9JIK1	620319	925356	460793	971742	725996	959489	625131	634938	494010	550681	488637	586491	669136	392321	587792	577886	754681	731179	656564	971245	1.04445e+06	861392	750251	1040725	3.66864e+06	1.15307e+06	835256	738715	6.12435e+06	869318
Q9JJ19	85289.4	20467.7	44771	35096.7	41214.7	57251.8	98844.5	196899	64955.1	159732	246851	82322	72900.6	259040	47239.4	111796	80245.5	247716	117054	50651.7	96134.2	47145	129413	56887.5	836208	88408.8	798491	177421	505609	355345
Q9JJ40	56817.2	16509.6	27056.1	19314.6	13293.7	24347.1	44068.9	51990.7	43949.2	67860.8	79060.5	57185.8	24299.8	31728.2	16464.7	20551.4	18908.3	89911.7	66883.6	37498	39370.2	21456.4	39775.1	21658.1	298256	31000.9	184345	40657.8	1.22908e+06	56595.9
Q9JLS4	144548	188187	489985	248842	311517	206545	190647	65903.5	183990	106210	63646.8	85291.5	99200.7	144064	71108.3	74146.5	154712	61812.9	109358	182246	140403	224660	174490	64736.8	95900.8	118523	209297	60902.6	199858	178853
Q9QW30	15632.9	32033.6	45147.8	31911.2	34545.1	35404.9	21126.9	26537.4	18203.3	14905	7284.08	13644.1	20556.5	16656.5	21060.8	24559.3	23796	16557.8	33646.3	22819	44889	23990.9	21408.6	24934.7	257801	17003.9	42543.9	14662	318032	18262
Q9QWJ9	38741	31261.8	16381.1	24181.5	30226.3	36042.5	18860.4	9881.49	12041.4	19564.2	9275.08	17118.8	22485.9	18888.8	14151.2	22666.7	26389.2	21785	18185.6	35756.9	27042.7	39275.8	10641.6	15755.5	291215	16918.3	26459.4	21901.4	654027	12388.3
Q9QX79	665629	510924	858793	518985	389278	484076	869391	445174	510001	710338	322576	484088	684329	406925	321893	273300	584634	428379	965851	1.20302e+06	806979	817376	495626	427284	182362	641276	708141	507002	604837	622662
Q9QX82	27480.5	41008.8	62503.6	42469.5	35101.6	27999.5	23570.9	17055.4	12571.3	11974.8	11548.7	11816.7	15670.8	21151.6	15262.9	12671.5	19132.6	13989.6	33890.6	28962.9	49509.2	35425.3	24234.3	37107.7	327602	29272.4	29844.2	22876	402585	20831.3
Q9QXQ0	15675.4	36152.4	14651.2	20135.6	23638	14971.8	26604.6	29298.3	26105.2	29754.6	58003.7	32707.4	24268.3	14110.4	14080.5	27146.7	22724.1	29296.5	55167.8	23830.9	41208.5	48948.6	20892.8	36834	257801	34255.7	39389.5	63032.1	319606	30482.2
Q9QZA2	32883.8	48643.4	30632.5	15178.3	25255	44135	32560.2	30796	20736.1	39468.2	27499	40820.8	28490.8	22588	12946.9	20018.5	28597.7	46033.3	42101.5	30336.8	32878.9	33824.6	34147.4	44984.9	377245	51459.6	60621.8	37249.2	390762	38483.3
Q9QZQ5	152794	556542	506228	256299	192900	135210	200362	205710	158440	132568	81928.6	77104.5	121498	206092	79714.3	77253.5	58312.9	38156.4	120729	119036	238823	105143	179826	98738.6	1.83372e+06	123486	133704	42211.1	340228	44458
Q9R044	48697	41884.5	108847	58220.9	35226.8	39469.9	57836.6	24411.5	43974.4	41974.2	19927.8	29054.1	77073.8	40221.9	42111.5	30819.2	69089	32638.9	25777.8	50663.3	95533.9	67543.5	52252.4	46030.5	199661	68633.2	46269.8	41446.8	8.18929e+06	33570.5
Q9R063	54088.6	26017.5	33115.1	24914	77030.4	84106.1	67479.2	87244.9	48266	48207.8	86184.3	67303.3	64980	71278.1	51105.9	115783	48153.9	98486.9	69818.9	74927.6	63598.3	45171.1	82252.1	83512.3	391839	97975.4	113961	79928.7	1.04028e+06	115378
Q9R066	30030.6	66101	99450.3	29193.2	21393.7	43852.1	62128.4	40211.7	35230.1	38893	41401.7	39036.9	19809.5	55434.9	47939	45387.9	38053.5	31713	65188.2	49299.8	40485.9	50424.4	44404.1	26314.9	198621	54767.3	54795.9	15380.7	39931988	26918.6
Q9R0D6	210625	370153	442441	399218	314408	258910	149044	161041	131170	155496	149565	154799	99220.4	161021	143583	176124	175342	138799	371322	253988	493586	284239	207376	221282	541786	269758	177763	135672	426548	90885.6
Q9R0J8	36025.8	53848.2	17977.1	21563.6	13885.9	20309.8	17540	23094.8	24953.4	27902.9	27543.8	20555.6	38921.6	25770.6	54604.5	92561	33704.5	31301.1	12180.5	10742.5	12292.6	25046	27442.4	29032.4	257801	34605.1	50074.9	44420.2	317763	37219.4
Q9R0T4	3.38924e+06	6272844	2.16451e+06	4229020	3.7073e+06	3.62347e+06	2.30184e+06	1.72301e+06	1671681	2.03373e+06	1.56168e+06	1.60291e+06	2083355	1.79829e+06	1.47517e+06	1793268	2.11134e+06	1.70171e+06	2742667	3.53319e+06	3.77576e+06	4.52038e+06	2966469	3458595	5582512	3341822	1.98559e+06	1.8891e+06	5091154	1.70725e+06
Q9R1T3	51096	79876.1	39774.3	50379.6	39320.6	33859.5	76389	91452.5	76272.6	57513.4	106151	76968.7	121854	116325	89554.7	93714.6	81228.5	64613.4	36625.2	16565.5	31331.6	16485.3	44885	97089.4	391839	50378.7	14071.5	23542.3	417260	20421.4
Q9WTQ2	104321	198491	331413	132256	75880.9	128448	151106	159206	106814	224147	108721	127020	202997	226978	146988	120328	290625	203909	128498	129787	167640	166070	208720	249446	1.12935e+06	145417	227932	189000	1.1103e+06	209746
Q9WTW7	22589.5	8462.33	10669.3	2840.08	8639.4	7487.28	50704.6	52394.8	49580.9	95354.3	152866	80521	23492.2	41234.5	18982.5	32400	20377	89581.7	40210.9	21577.7	29119	9750.53	54424	57307.2	298256	32825.2	152296	68961.2	980381	59814
Q9WU74	16538.9	20988.5	35636.4	24011.2	29129.5	24897.6	16999.3	10098.2	6831.72	12589.3	13448.9	10678.1	17989.5	12819.7	9176.32	13318.1	12142.8	11170.1	26914.7	22435.7	17852.8	16630.5	14352.8	17656	257801	20579.9	17418.5	18819.6	654027	12802.3
Q9WUC4	271513	70330.8	211018	207504	179841	201835	268786	158065	192564	300739	134610	147205	257817	170797	209284	206256	151583	157700	131604	138872	154022	219451	153722	187437	1.59074e+06	195148	679466	404829	1.22413e+06	488248
Q9WUK5	318277	295999	523071	417046	500145	330851	340349	367727	364812	332752	293391	269338	381966	480095	382516	280441	378608	206727	280534	346499	443242	359763	467868	606715	944618	619083	285544	341044	1.24637e+06	332815
Q9WUW3	81137.4	115688	129846	88673.1	103163	97394.9	88499.1	117082	105175	81023.5	13065.8	109090	70367.5	34594.9	88416.2	59109.1	46577.5	57273.9	150636	67449.5	79067.7	156812	98917.7	26104.4	66808	61195.3	29373.8	18633.9	314857	122551
Q9WUW8;Q9WUW9	12293.3	10539.9	16222.2	13311.3	12547.6	11154.5	24486.6	57071.5	37076.6	11251.2	61427.9	29291.5	9682.55	18349.2	47530	42511.6	17298.9	47771	13879.7	13101.8	17871.9	7728.65	19623.2	28710.5	273100	18655.5	41428.2	32498.7	329587	34973.7
Q9Z1Y3	314766	640796	712235	364678	343920	358309	207772	294083	203759	196573	235723	233420	198200	292730	193595	216927	239304	239999	329427	443839	349884	553767	234736	431868	5.07476e+06	385243	261453	225996	750035	190528
Q9Z2L0	11363.1	9143.4	16848.7	5566.17	14244.1	7627.82	7880.28	103268	4729.5	100331	124401	11410.3	21400.7	44842.7	17466.5	18035.6	73571.3	286290	12654.6	13062.4	13135.8	2789.67	17280.6	9207.69	256087	6012.55	70071.6	8920.48	813649	24691.5
Q9Z339	20223.7	35541	36776	19413.6	27255.8	21010.2	18559.3	62669.8	49215.9	16016.7	73921.5	40313.4	26672	77941.6	119851	101501	32395.6	33538.3	101470	43315.3	54941.5	57919	101519	147257	354221	45045.8	140041	113938	912839	89763.2
